# Supplementary material for: B–N coordinated triaryl pyrazole: effect of dimerization, and optical and NLO properties
Source: Royal Society of Chemistry journal article supplement (doi:10.1039/c9tc04309h), 2019-01-01
Supplement: c9tc04309h1.pdf [file c9tc04309h1.pdf]

Supporting Information

for

**B-N coordinated triaryl pyrazole: Effect of dimerization, optical and NLO properties**

Vanga Mukundam,<sup>a</sup> Shreenibasa Sa,<sup>a</sup> Anupa Kumari,<sup>b</sup> Ritwick Das<sup>b\*</sup> and Krishnan Venkatasubbaiah<sup>a\*</sup>

<sup>a</sup>*School of Chemical Sciences, <sup>b</sup>School of Physical Sciences National Institute of Science Education and Research (NISER), HBNI, Bhubaneswar-752050, Odisha (India).*

*\*Corresponding author. E-mail: [krishv@niser.ac.in](mailto:krishv@niser.ac.in)*

## General Information

All reagents and starting materials were purchased from Sigma-Aldrich, Alfa Aesar and Spectrochem chemical companies and used as received unless otherwise noted. Tetrahydrofuran and toluene were distilled from Na/benzophenone prior to use. Dichloromethane, N,N-dimethylformamide and acetonitrile were distilled from CaH<sub>2</sub>. 2,7-Dibromo-9,9-dihexyl-9H-fluorene, 1,4-dibromo-2,5-bis(hexyloxy)benzene, 2,7-dibromo-9-hexyl-9H-carbazole, 2,5-bis(tributylstannyl)thiophene and 5,5'-bis(tributylstannyl)-2,2'-bithiophene were prepared by following literature reported methods.<sup>1-4</sup> All 400 MHz <sup>1</sup>H, 100 MHz <sup>13</sup>C and 128 MHz <sup>11</sup>B NMR spectra were recorded on a Bruker ARX 400 spectrometer operating at 400 MHz. All <sup>1</sup>H and <sup>13</sup>C NMR spectra were referenced internally to solvent signals. <sup>11</sup>B NMR spectra were referenced externally to BF<sub>3</sub>·Et<sub>2</sub>O in CDCl<sub>3</sub> ( $\delta = 0$ ). ESI mass spectra were recorded using a Bruker microTOF-QII mass spectrometer. The absorbance spectra were recorded with a JASCO V-730 UV-Visible spectrometer. The fluorescence spectra were recorded using Edinburgh FS5 spectrofluorometer. Absolute fluorescence quantum yields of compounds **4** and **7-11** in solution and solid state were measured by integrating sphere method using Edinburgh FS5 spectrofluorometer. Single-crystal X-ray diffraction data were collected on a Bruker APEX-II diffractometer equipped with an Oxford Instruments low-temperature attachment. The data were collected at 100 K using Mo-K $\alpha$  radiation (0.71073 Å). SADABS absorption corrections were applied. The structures were solved and refined with SHELX suite of programs. All non-hydrogen atoms were refined with anisotropic displacement coefficients. The H atoms were placed at calculated positions and were refined as riding atoms. Crystallographic data for compounds **4**, **8**, **10** & **11** has been deposited with the Cambridge Crystallographic Data Center as supplementary publication no. CCDC- 1936275-1936278. Copies of the data can be obtained free of charge on application to CCDC, 12 Union Road, Cambridge CB2 1EZ, UK (fax: (+44) 1223-336-033; email: [deposit@ccdc.cam.ac.uk](mailto:deposit@ccdc.cam.ac.uk)). DFT calculations were performed with the Gaussian09 program.<sup>5</sup> The structures were optimized using 6-31G(d) (B3LYP) as the basis set. Excitation data were determined using TD-DFT (B3LYP) calculations.

The NLO coefficients, namely, nonlinear refractive index ( $n_2$ ) and nonlinear absorption ( $\beta$ ) is estimated using closed-aperture (CA) and open-aperture (OA) single-beam Z-scan technique. The experimental set-up, shown in Fig. S1, comprises a frequency-doubled pulsed Yb-doped fiber laser (Model: Cazadero, M/S Calmar Inc., USA) which emits Fourier-transform limited (FTL) ultrashort pulses ( $\Delta\tau \approx 300$  fs) at an operating wavelength of  $\lambda = 1030$  nm. The

Yb-fiber laser system delivers fixed pulse energy of  $\approx 30 \mu\text{J}$  across a broad range of pulse repetition rate (RR), ranging from 780 Hz to 200 kHz. In the preliminary investigation, we fix the repetition rate at 1 kHz so as to minimize the thermally-induced manifestations during the NLO measurements. An optimally focused single-pass frequency-doubling of Yb-fiber laser is carried out using an  $\text{LiB}_3\text{O}_6$  (LBO) crystal of length  $L = 4 \text{ mm}$ , which generates transform-limited green ultrashort ( $\Delta\tau \lesssim 300 \text{ fs}$ ) pulses at  $\lambda = 515 \text{ nm}$ . The choice of length for LBO crystal is governed by the onset of group-velocity mismatch between the interacting waves which could degrade the pulse-shape and consequently, adversely affect the pulse energy. The green ultrashort pulses have maximum energy of  $3 \mu\text{J}$  at the repetition rate of 1 kHz. A combination of half-wave plate (HWP) and a polarizing beam-splitter (PBS) is employed for incidence of optimum laser fluence on the samples. A convex lens ( $f = 150 \text{ mm}$ ) is used to focus the beam at the sample ( $z = 0$ ). The green beam spot-size at ( $z = 0$ ) is measured to be  $w_0 = 50 \mu\text{m}$  which results in a Rayleigh-length of  $\approx 3 \text{ cm}$ . Since, we translate the sample to more than 10 cm, the experimental configuration allowed us to apply thin-sample approximation for estimating the NLO coefficients. The closed-aperture (CA) as well as open-aperture (OA) transmitted pulse energy was recorded using a pyroelectric energy meter (Model: PE9-ES-C, M/S Ophir Inc., USA). In order to observe the impact of thermal effects on NLO properties of dimers, we measured the OA and CA Z-scan transmittance at 80 MHz RR as well. The optical pulses at 80 MHz RR were derived through a frequency-doubled Yb-fiber laser (FP-1060-5-FS, Fianium, UK) which delivered FTL ultrashort pulses of 200 fs (approximately) at 532 nm wavelength.

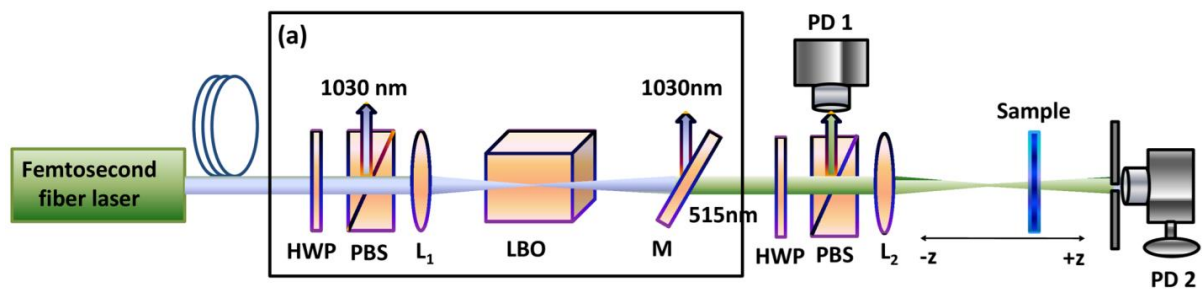

**Figure S1:** Schematic of closed aperture Z-Scan experimental setup. HWP: Half wave plate; PBS: polarizing beam splitter; L1: Convex Lens (100mm); L2: Convex Lens (150mm); PD1: Reference photodetector; PD2: Pyroelectric energy meter. (*Inset* (a) represents setup of second harmonic generation (SHG) of the pump beam).

From a practical perspective, it is important to note that the non-resonant NLO responses occur at extremely short time-scales ( $< 1 \text{ ps}$ ) and therefore, ultrashort optical pulses are essentially required for appropriately characterizing NLO properties. Conventionally, the

measurement of NLO coefficients is carried out using ultrashort pulsed lasers in the visible or near-infrared band. However, such laser systems exhibit high repetition-rates ( $R > 1$  MHz) which could result in unavoidable thermal lensing effect during the measurements. The thermal lensing effect is primarily due to accumulated thermal effects (ATE) in liquid as well as solid samples. In other words, the ATE comes into play when pulses are incident on the sample at a time-scale faster than the characteristic thermal lifetime  $t_c = \frac{w_0^2}{4D}$  where  $w_0$  is beam-spot size and  $D$  is thermal diffusivity of medium i.e. ATE would affect the NLO measurements for  $R \geq 1/t_c$ . This manifestation is dominant in case of liquids due to their small thermal diffusivities  $10^{-7}$ - $10^{-8}$  m<sup>2</sup>/s as compared to solid dielectric or semiconducting materials such as quartz  $10^{-4}$ - $10^{-5}$  m<sup>2</sup>/s. Typically,  $1/t_c \approx 0.5$  kHz in case of liquid samples for tightly focused beams ( $w_0 \approx 50$   $\mu$ m). This implies that the NLO measurements using ultrashort pulsed lasers with  $R \gg 1$  kHz are inevitably accompanied by thermal lensing induced manifestations. In order to elucidate this point, we also carried out OA as well as CA Z-scan measurements at 1 kHz as well as at 80 MHz of repetition rates of solutions of various boron-doped triaryl pyrazole dimers.

### Synthetic procedure and spectral characterization

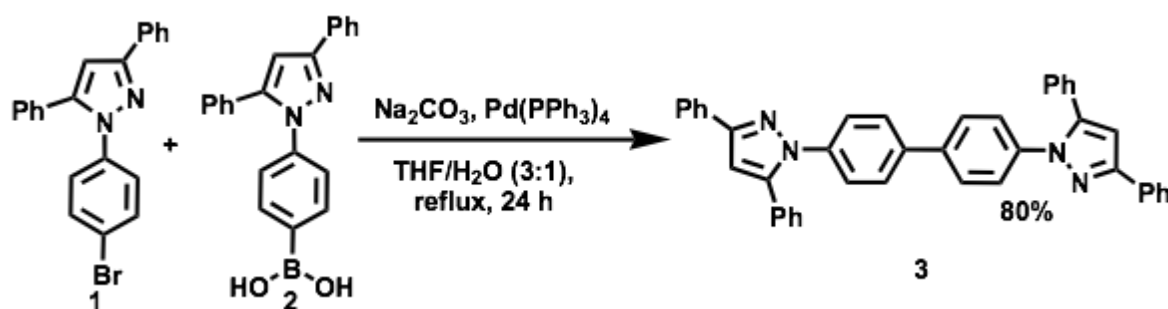

**Scheme S1.** Synthesis of compound **3**

### Synthesis of compound 3

Compound **1** was synthesized using the literature reported method.<sup>6</sup> 4-Bromophenylhydrazine hydrochloride (5.48 g, 24.53 mmol), and 1,3-diphenylpropane-1,3-dione (5.00 g, 22.30 mmol) were dissolved in 40 mL of methanol and 40 mL of acetic acid. The reaction mixture was heated to reflux for 24 h and then poured into distilled water, extracted with ethyl acetate. The combined organic layers were washed with saturated NaHCO<sub>3</sub> solution, distilled water, brine and dried over Na<sub>2</sub>SO<sub>4</sub>. The solvent was removed under vacuum and the resulting residue was purified by silica gel column chromatography using ethyl acetate *n*-hexane as the eluent to yield compound **1** (yield = 75%). Compound **2** was synthesized following analogues literature reported method.<sup>7</sup> *n*-BuLi (7.00 mL, 11.19 mmol, 1.6 M in hexane) was added dropwise to a solution of compound **1** (3.50 g, 9.32 mmol) at -78 °C in anhydrous THF under nitrogen atmosphere. After being stirred at the same temperature for 0.5 h, B(O<sup>*i*</sup>Pr)<sub>3</sub> (11.19 mmol, 2.58 mL) was added dropwise *via* syringe. The reaction mixture was warmed to room temperature and stirred overnight at that temperature. 3 N HCl (75 mL) was added to the reaction mixture, stirred for 1 h and extracted with ethyl acetate. The combined organic layers were washed with brine, dried over Na<sub>2</sub>SO<sub>4</sub> then concentrated. The resultant compound was washed with hot hexane and diethyl ether, to get compound **2** as a white powder and used without further purification. Synthesis of compound **3**. Degassed mixture of THF:H<sub>2</sub>O (60:20 mL) was added to a mixture of compound **1** (3.30 g, 8.82 mmol), compound **2** (3.30 g, 9.70 mmol), Na<sub>2</sub>CO<sub>3</sub> (4.69 g, 44.1 mmol) and Pd(PPh<sub>3</sub>)<sub>4</sub> (305 mg, 0.26 mmol) under nitrogen atmosphere. The reaction mixture was refluxed for 24 h and cooled to room temperature. Distilled water was then added to the reaction mixture and extracted with ethyl acetate (3 × 25 mL). The combined organic layers were washed with brine solution, dried over Na<sub>2</sub>SO<sub>4</sub> and concentrated. The residue was purified by silicagel column chromatography using *n*-hexane/ethylacetate mixture as the eluent. Yield: 4.16 g, (80%). mp: 280 °C. <sup>1</sup>H NMR (400 MHz, CDCl<sub>3</sub>): δ = 7.96 – 7.94 (m, 4H), 7.58 – 7.56 (m, 4H), 7.47 – 7.43 (m, 8H), 7.38 – 7.33 (m, 12H), 6.85 (s, 2H) ppm. <sup>13</sup>C NMR (100 MHz, CDCl<sub>3</sub>): δ = 152.28, 144.54, 139.68, 139.10, 133.12, 130.73, 128.96, 128.81, 128.73, 128.56, 128.21, 127.56, 125.97, 125.55, 105.64 ppm. HR-MS (ESI): calcd. for C<sub>42</sub>H<sub>31</sub>N<sub>4</sub> ([M + H]<sup>+</sup>): 591.2543, found : 591.2514.



layers were washed with brine solution, dried over sodium sulfate and concentrated. The residue was purified by silica-gel column chromatography using *n*-hexane/ethyl acetate mixture as the eluent. Yield: 5 g, (90 %). mp: 217 °C. <sup>1</sup>H NMR (400 MHz, CDCl<sub>3</sub>): δ = 8.04 (s, 1H), 7.89 – 7.87 (m, 2H), 7.68 – 7.51 (m, 9H), 6.84 (d, *J* = 8.1 Hz, 1H), 6.64 (s, 1H), 1.40 (s, 12H), 0.23 (s, 6H) ppm. <sup>13</sup>C NMR (100 MHz, CDCl<sub>3</sub>): δ = 154.85, 148.68, 140.67, 140.31, 136.38, 132.04, 130.36, 129.64, 129.56, 129.03, 128.66, 128.42, 126.88, 111.16, 110.93, 83.64, 24.97, 9.28 ppm. <sup>11</sup>B NMR (128 MHz, CDCl<sub>3</sub>): δ = 32.24 (s), -0.17 (s) ppm. HR-MS (ESI): calcd. for C<sub>29</sub>H<sub>32</sub>B<sub>2</sub>N<sub>2</sub>O<sub>2</sub> ([M + H]<sup>+</sup>): 463.2733, found : 463.2733.

## References:

- (1) Pal, B.; Yen, W.-C.; Yang, J.-S.; Su, W.-F. *Macromolecules* **2007**, *40*, 8189.
- (2) Rice, N. A.; Adronov, A. *Macromolecules* **2013**, *46*, 3850.
- (3) Guo, X.; Watson, M. D. *Org. Lett.* **2008**, *10*, 5333.
- (4) Norris, B. N.; Zhang, S.; Campbell, C. M.; Auletta, J. T.; Calvo-Marzal, P.; Hutchison, G. R.; Meyer, T. Y. *Macromolecules* **2013**, *46*, 1384.
- (5) Gaussian 09 (Rev. C.02), M. J. Frisch, G. W. Trucks, H. B. Schlegel, G. E. Scuseria, M. A. Robb, J. R. Cheeseman, G. Scalmani, V. Barone, B. Mennucci, G. A. Petersson, H. Nakatsuji, M. Caricato, X. Li, H. P. Hratchian, A. F. Izmaylov, J. Bloino, G. Zheng, J. L. Sonnenberg, M. Hada, M. Ehara, K. Toyota, R. Fukuda, J. Hasegawa, M. Ishida, T. Nakajima, Y. Honda, O. Kitao, H. Nakai, T. Vreven, J. J. A. Montgomery, J. E. Peralta, F. Ogliaro, M. Bearpark, J. J. Heyd, E. Brothers, K. N. Kudin, V. N. Staroverov, R. Kobayashi, J. Normand, K. Raghavachari, A. Rendell, J. C. Burant, S. S. Iyengar, J. Tomasi, M. Cossi, N. Rega, N. J. Millam, M. Klene, J. E. Knox, J. B. Cross, V. Bakken, C. Adamo, J. Jaramillo, R. Gomperts, R. E. Stratmann, O. Yazyev, A. J. Austin, R. Cammi, C. Pomelli, J. W. Ochterski, R. L. Martin, K. Morokuma, V. G. Zakrzewski, G. A. Voth, P. Salvador, J. J. Dannenberg, S. Dapprich, A. D. Daniels, \_ Farkas, J. B. Foresman, J. V. Ortiz, J. Cioslowski and D. J. Fox, Gaussian, Inc., Wallingford CT, 2009.
- (6) Mamidala, R.; Mukundam, V.; Dhanunjayarao, K.; Venkatasubbaiah, K., *Dalton Trans.* **2014**, *44*, (12), 5805.
- (7) Wang, C.; Rakshit, S.; Glorius, F. *J. Am. Chem. Soc.*, **2010**, *132*, 14006.

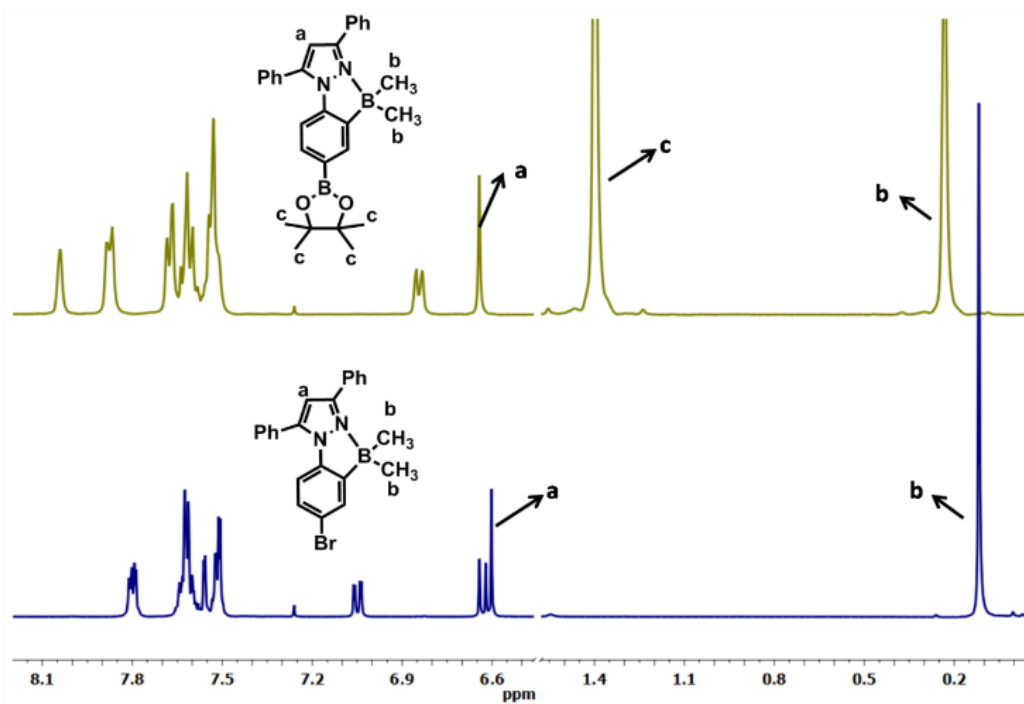

Figure S2:  $^1\text{H}$  NMR spectrum of compound 5 and 6.

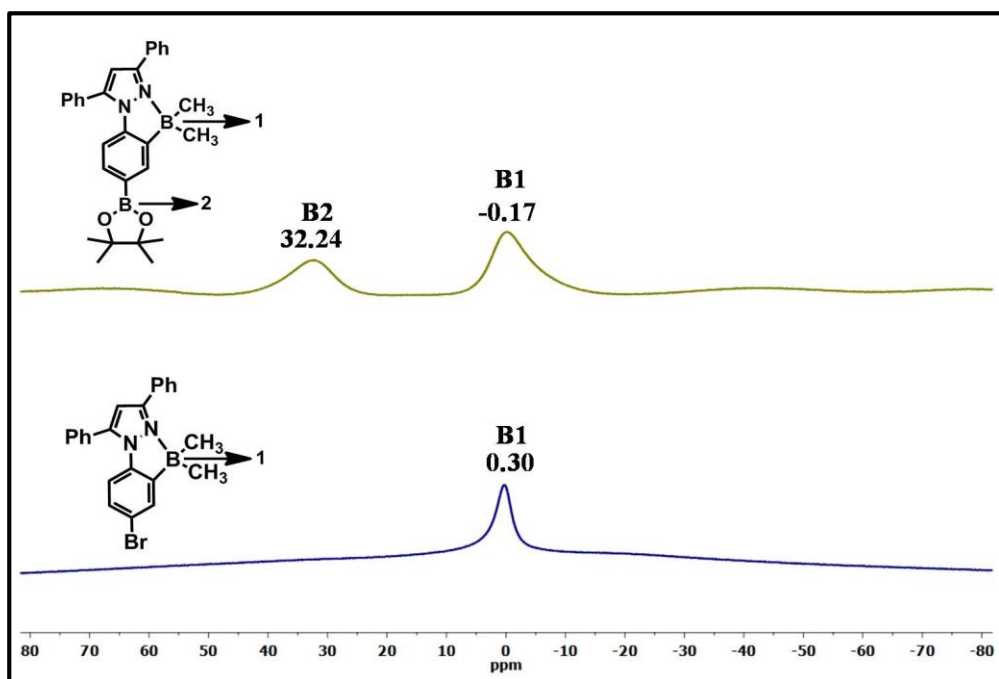

Figure S3:  $^{11}\text{B}$  NMR spectrum of compound 5 and 6.



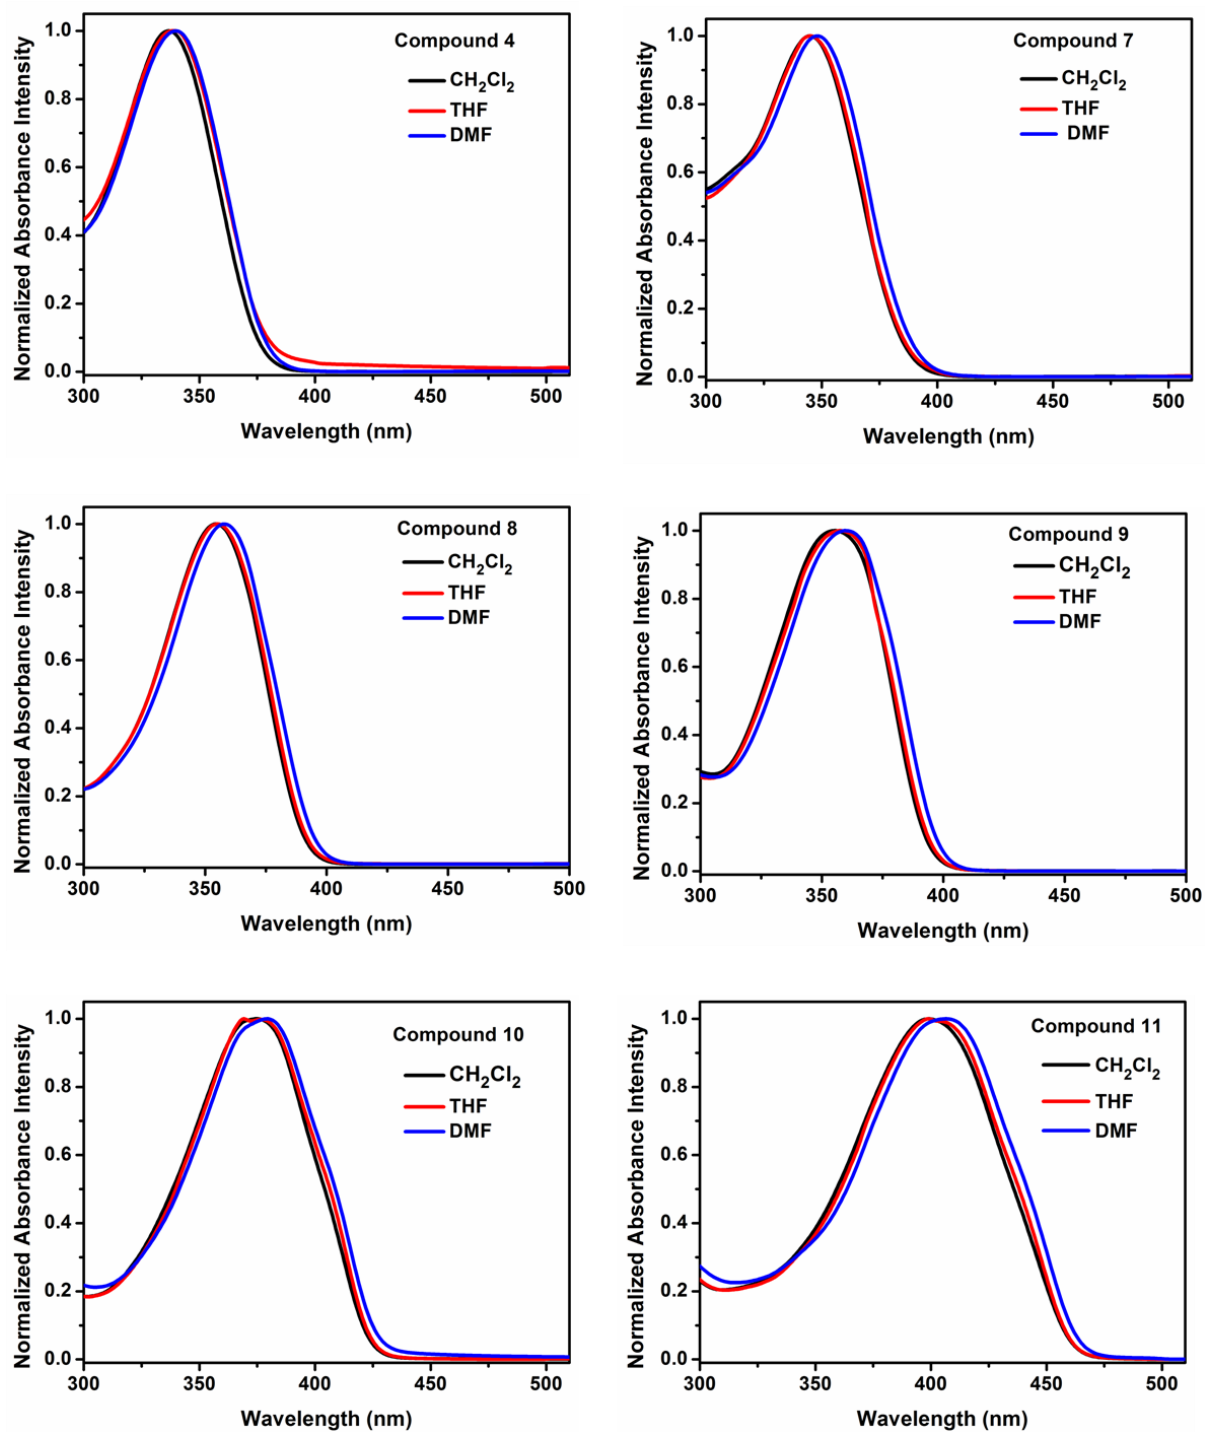

**Figure S4:** Comparison of normalized absorption spectra of **4** and **7-11** in different solvents.

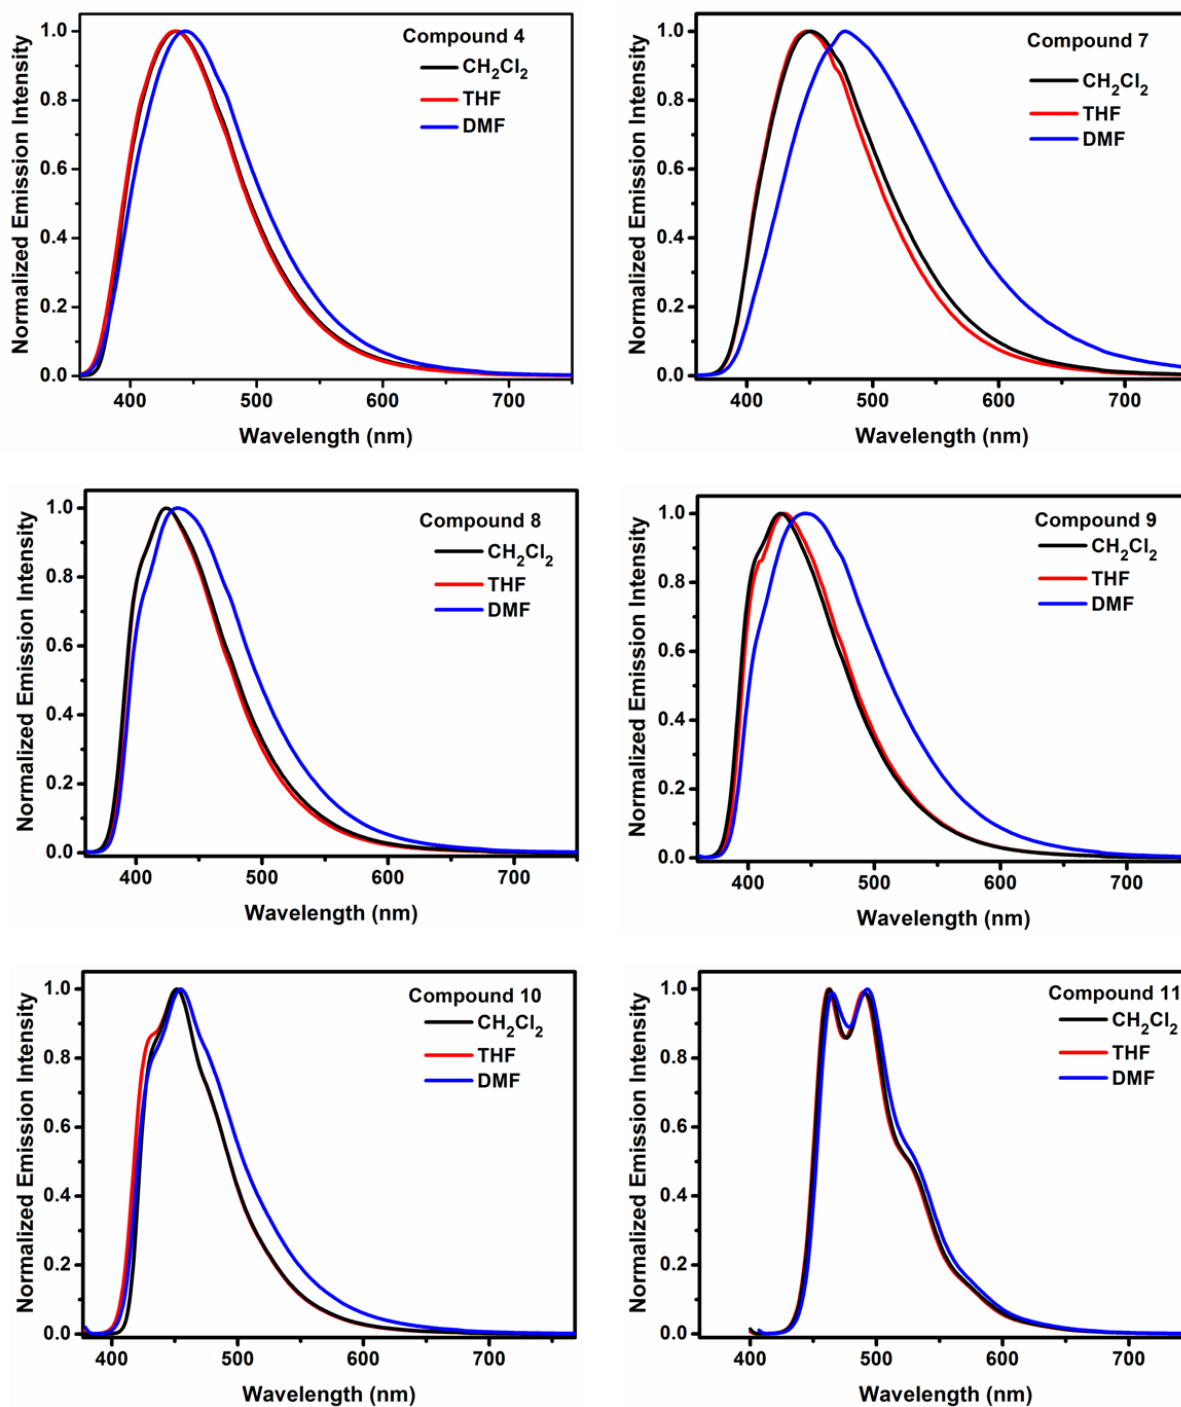

**Figure S5:** Comparison of normalized emission spectra of **4** and **7-11** in different solvents.

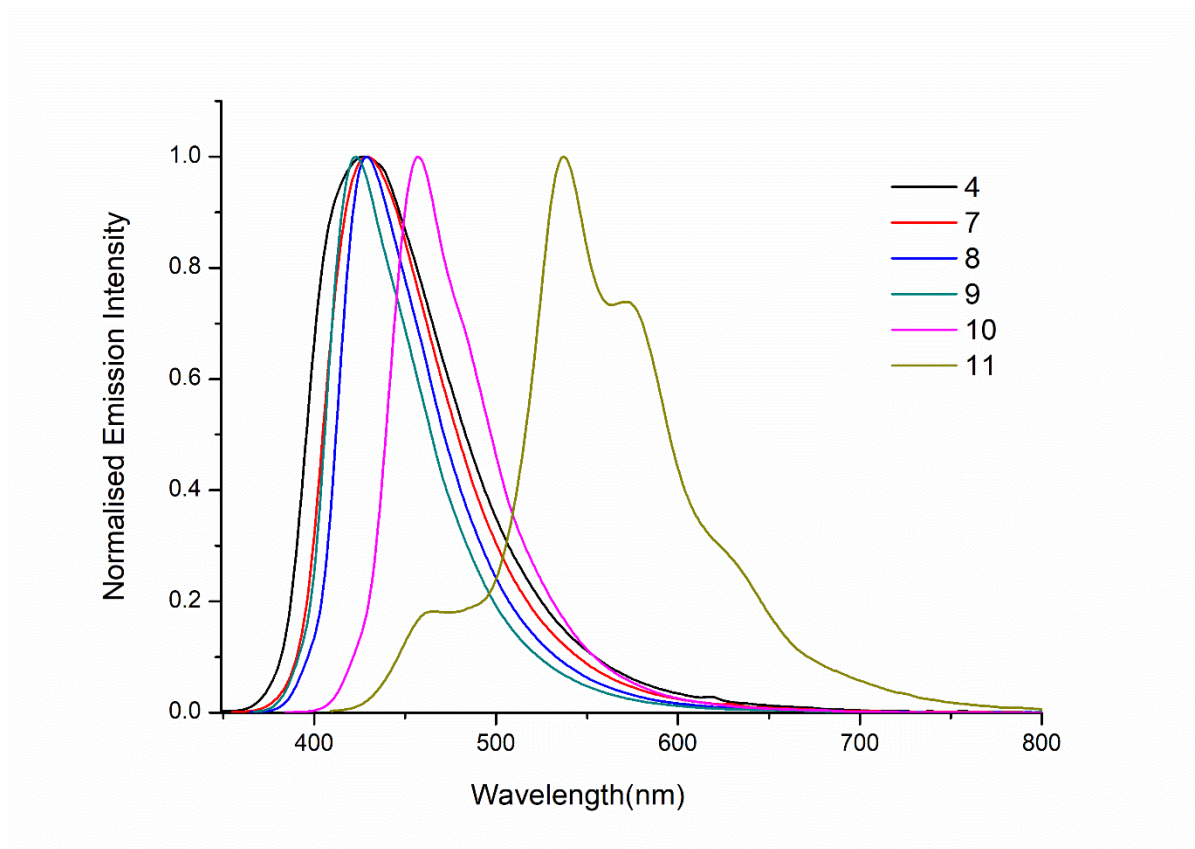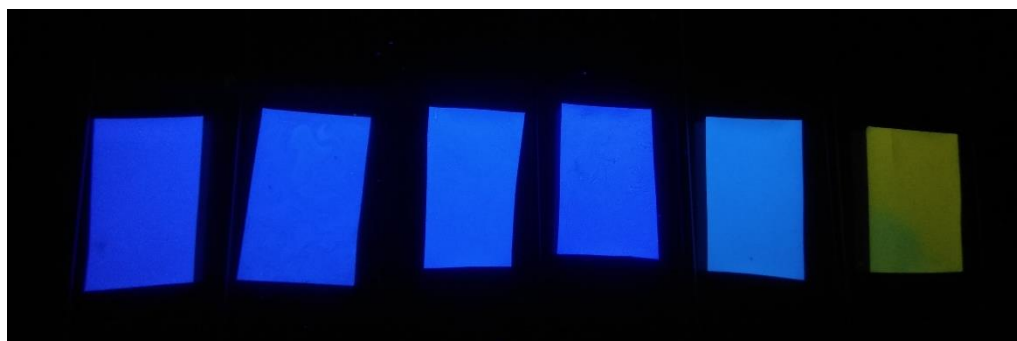

**Figure S6:** A comparison of normalized emission spectra of **4** and **7-11** in PMMA film (top). The fluorescence photograph of compounds **4** and **7-11** (left to right) in PMMA film (bottom). Irradiation was performed with a UV lamp with a wavelength of 365 nm.

**Table S1.** Electrochemical data of **4** & **7-11**

| Compound | E <sub>pc</sub> <sup>#</sup> (V) | Compound  | E <sub>pc</sub> <sup>#</sup> (V) |
|----------|----------------------------------|-----------|----------------------------------|
| <b>4</b> | -2.55, -2.82                     | <b>9</b>  | -2.49, -2.76                     |
| <b>7</b> | -2.53, -2.76                     | <b>10</b> | -2.47, -2.74                     |
| <b>8</b> | -2.49, -2.74                     | <b>11</b> | -2.31, -2.49                     |

<sup>#</sup>E<sub>pc</sub> = cathodic potential

**Table S2:** Crystal data and structure refinement parameters for compounds **4**, **8**, **10** and **11**.

| Compound                                  | <b>4</b>                                                      | <b>8</b>                                                      | <b>10</b>                                                       | <b>11</b>                                                                    |
|-------------------------------------------|---------------------------------------------------------------|---------------------------------------------------------------|-----------------------------------------------------------------|------------------------------------------------------------------------------|
| Empirical formula                         | C <sub>46</sub> H <sub>40</sub> N <sub>4</sub> B <sub>2</sub> | C <sub>71</sub> H <sub>72</sub> B <sub>2</sub> N <sub>4</sub> | C <sub>50</sub> H <sub>42</sub> B <sub>2</sub> N <sub>4</sub> S | C <sub>54</sub> H <sub>44</sub> B <sub>2</sub> N <sub>4</sub> S <sub>2</sub> |
| Formula weight                            | 670.44                                                        | 1002.94                                                       | 752.55                                                          | 834.67                                                                       |
| Temperature/K                             | 100.00                                                        | 100.00                                                        | 100.00                                                          | 100.00                                                                       |
| Crystal system                            | Monoclinic                                                    | Triclinic                                                     | Triclinic                                                       | Monoclinic                                                                   |
| Space group                               | <i>P</i> 2 <sub>1</sub> / <i>n</i>                            | <i>P</i> -1                                                   | <i>P</i> -1                                                     | <i>P</i> 2 <sub>1</sub> / <i>c</i>                                           |
| <i>a</i> /Å                               | 12.284(4)                                                     | 13.4091(6)                                                    | 11.5795(5)                                                      | 7.0486(17)                                                                   |
| <i>b</i> /Å                               | 7.108(2)                                                      | 14.0249(7)                                                    | 12.0816(5)                                                      | 15.859(4)                                                                    |
| <i>c</i> /Å                               | 21.887(9)                                                     | 19.5464(13)                                                   | 16.8101(11)                                                     | 19.155(5)                                                                    |
| $\alpha$ /°                               | 90                                                            | 109.303(4)                                                    | 97.113(4)                                                       | 90                                                                           |
| $\beta$ /°                                | 105.717(7)                                                    | 95.233(4)                                                     | 100.900(4)                                                      | 95.549(6)                                                                    |
| $\gamma$ /°                               | 90                                                            | 112.832(3)                                                    | 117.414(3)                                                      | 90                                                                           |
| Volume/Å <sup>3</sup>                     | 1839.7(11)                                                    | 3094.0(3)                                                     | 1989.06(19)                                                     | 2131.2(9)                                                                    |
| <i>Z</i>                                  | 2                                                             | 2                                                             | 2                                                               | 2                                                                            |
| $\rho_{\text{calcd}}$ /g cm <sup>-3</sup> | 1.210                                                         | 1.077                                                         | 1.257                                                           | 1.301                                                                        |
| $\mu$ /mm <sup>-1</sup>                   | 0.070                                                         | 0.062                                                         | 0.123                                                           | 0.169                                                                        |
| <i>F</i> (000)                            | 708.0                                                         | 1072.0                                                        | 792.0                                                           | 876.0                                                                        |
| 2 $\theta$ range for data collection/°    | 3.464 to 50.88                                                | 2.282 to 51.444                                               | 2.542 to 49.998                                                 | 3.34 to 50.938                                                               |

|                                                         |                                                                        |                                                                          |                                                                          |                                                                        |
|---------------------------------------------------------|------------------------------------------------------------------------|--------------------------------------------------------------------------|--------------------------------------------------------------------------|------------------------------------------------------------------------|
| Index ranges                                            | $-14 \leq h \leq 14$ ,<br>$-4 \leq k \leq 8$ ,<br>$-26 \leq l \leq 26$ | $-16 \leq h \leq 16$ ,<br>$-16 \leq k \leq 17$ ,<br>$-23 \leq l \leq 23$ | $-13 \leq h \leq 13$ ,<br>$-14 \leq k \leq 14$ ,<br>$-19 \leq l \leq 19$ | $-7 \leq h \leq 8$ ,<br>$-19 \leq k \leq 19$ ,<br>$-23 \leq l \leq 23$ |
| Reflns. collected                                       | 9945                                                                   | 38403                                                                    | 22351                                                                    | 27851                                                                  |
| Independent reflns                                      | 3380<br>[ $R_{\text{int}} = 0.0800$ ,<br>$R_{\text{sigma}} = 0.1002$ ] | 11760<br>[ $R_{\text{int}} = 0.0744$ ,<br>$R_{\text{sigma}} = 0.0881$ ]  | 6973 [<br>$R_{\text{int}} = 0.0530$ ,<br>$R_{\text{sigma}} = 0.0576$ ]   | 3937 [ $R_{\text{int}} = 0.1428$ ,<br>$R_{\text{sigma}} = 0.1165$ ]    |
| Data/restraints/<br>parameters                          | 3380/0/237                                                             | 11760/27/713                                                             | 6973/0/519                                                               | 3937/0/283                                                             |
| GOF on $F^2$                                            | 1.029                                                                  | 0.940                                                                    | 1.086                                                                    | 0.978                                                                  |
| Final R indices [ $I > 2\sigma(I)$ ]                    | $R_I = 0.0770$ ,<br>$wR_2 = 0.1886$                                    | $R_I = 0.0569$ ,<br>$wR_2 = 0.1477$                                      | $R_I = 0.0633$ ,<br>$wR_2 = 0.1632$                                      | $R_I = 0.0559$ ,<br>$wR_2 = 0.1223$                                    |
| R indices (all data)                                    | $R_I = 0.1389$ ,<br>$wR_2 = 0.2299$                                    | $R_I = 0.1060$ ,<br>$wR_2 = 0.1669$                                      | $R_I = 0.0821$ ,<br>$wR_2 = 0.1740$                                      | $R_I = 0.1252$ ,<br>$wR_2 = 0.1524$                                    |
| Largest diff. peak<br>and hole [ $e \text{ \AA}^{-3}$ ] | 0.39 and -0.31                                                         | 0.28 and -0.28                                                           | 0.40 and<br>-0.27                                                        | 0.30 and -0.24                                                         |

**Table S3:** Comparison of bond length [ $\text{\AA}$ ], angle [deg], deviation of boron atom from  $\text{C}_2\text{N}_2\text{B}$  plane [ $\text{\AA}$ ] and inter planar angle [deg] data for compounds **4**, **8**, **10** and **11**.

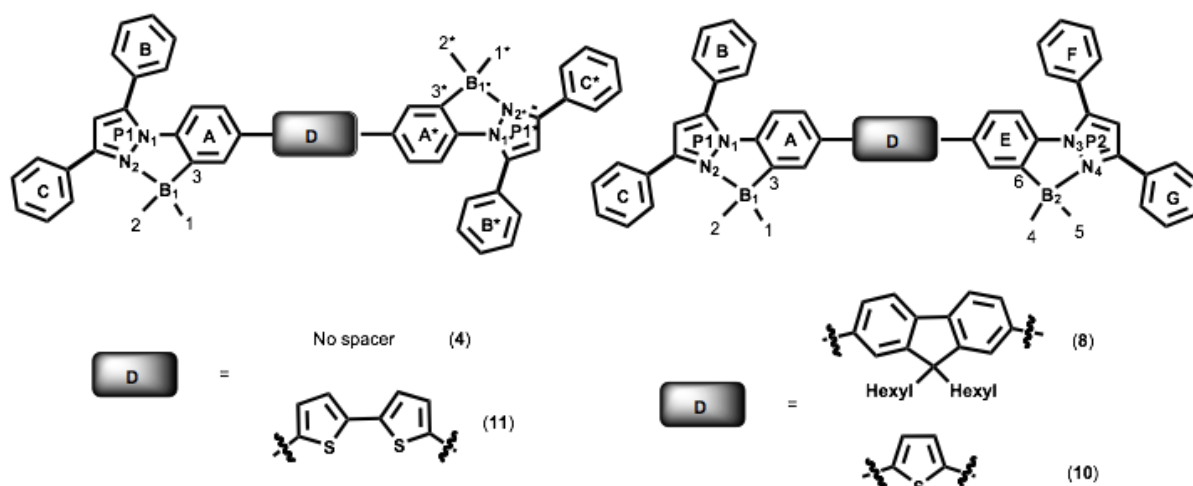

|       | <b>4</b> | <b>8</b> | <b>10</b> | <b>11</b> |
|-------|----------|----------|-----------|-----------|
| B1-C1 | 1.612(6) | 1.606(4) | 1.613(5)  | 1.617(5)  |
| B1-C2 | 1.625(5) | 1.610(4) | 1.615(6)  | 1.613(5)  |
| B1-C3 | 1.604(6) | 1.609(3) | 1.606(5)  | 1.602(5)  |

|                                                                   |           |           |           |           |
|-------------------------------------------------------------------|-----------|-----------|-----------|-----------|
| B1-N2                                                             | 1.654(5)  | 1.648(3)  | 1.672(5)  | 1.664(4)  |
| C1-B1-C2                                                          | 115.2(3)  | 113.7(2)  | 116.9(3)  | 113.6(3)  |
| C1-B1-C3                                                          | 114.6(3)  | 117.0(2)  | 110.2(3)  | 113.9(3)  |
| C2-B1-C3                                                          | 109.6(3)  | 110.3(2)  | 110.8(3)  | 111.9(3)  |
| C1-B1-N2                                                          | 109.7(3)  | 109.3 (2) | 112.8(3)  | 108.6(3)  |
| C2-B1-N2                                                          | 110.8(3)  | 110.2(2)  | 109.0(3)  | 112.7(3)  |
| C3-B1-N2                                                          | 95.1(3)   | 94.6(2)   | 95.1(2)   | 94.7(2)   |
| B2-C4                                                             |           | 1.613(4)  | 1.621(6)  |           |
| B2-C5                                                             |           | 1.616(3)  | 1.608(6)  |           |
| B2-C6                                                             |           | 1.607(3)  | 1.604(5)  |           |
| B2-N4                                                             |           | 1.649(3)  | 1.648(5)  |           |
| C4-B2-C5                                                          |           | 113.0(2)  | 116.0(4)  |           |
| C4-B2-C6                                                          |           | 115.2(2)  | 108.0(3)  |           |
| C5-B2-C6                                                          |           | 111.6(2)  | 114.8(3)  |           |
| C4-B2-N4                                                          |           | 109.2(2)  | 110.2(3)  |           |
| C5-B2-N4                                                          |           | 112.1 (2) | 114.8(3)  |           |
| C6-B2-N4                                                          |           | 94.3 (2)  | 95.3(3)   |           |
| Deviation of B1 from<br>C <sub>2</sub> N <sub>2</sub> B Plane (Å) | -0.076    | -0.035    | -0.069    | -0.017    |
| Pyrazole P1//Plane A                                              | 14.50(10) | 6.35(9)   | 11.62(12) | 10.17(9)  |
| Pyrazole P1//Plane B                                              | 57.66(12) | 84.21(9)  | 42.73(11) | 62.86(10) |
| Pyrazole P1//Plane C                                              | 32.02(12) | 60.99(9)  | 13.40(10) | 29.87(11) |
| PlaneA//Plane D                                                   |           | 34.11(6)  | 15.65(10) | 9.46(9)   |
| Deviation of B2 from<br>C <sub>2</sub> N <sub>2</sub> B Plane (Å) |           | 0.055     | 0.055     |           |
| Pyrazole P2//Plane E                                              |           | 19.32(7)  | 7.33(11)  |           |
| Pyrazole P2//Plane F                                              |           | 60.29(7)  | 37.79(12) |           |
| Pyrazole P2//Plane G                                              |           | 40.79(9)  | 37.29(12) |           |
| Plane E //Plane D                                                 |           | 36.41(6)  | 4.17(9)   |           |

**Table S4.** Computed orbitals from DFT (B3LYP:6-31G(d)) calculations for compounds **Pz**, **Pz-B**, **4** & **7-11** (color red indicates negative and green indicates positive)

| Compound                                                                                                                                                                             | HOMO                                                                                              | LUMO                                                                                               |
|--------------------------------------------------------------------------------------------------------------------------------------------------------------------------------------|---------------------------------------------------------------------------------------------------|----------------------------------------------------------------------------------------------------|
| <p><b>Pz</b></p> 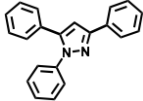                                                                                   |  <p>-5.6304</p>  |  <p>-0.9248</p> |
| <p><b>Pz-B</b></p>                                                                                  |  <p>-5.712</p>   |  <p>-1.306</p>  |
| <p><b>4</b></p>                                                                                   |  <p>-5.195</p> |  <p>-1.469</p> |
| <p><b>7</b></p>  <p>Instead of hexyl,<br/>OMe was used to<br/>reduce the<br/>computation time</p> |  <p>-4.868</p> |  <p>-1.332</p> |

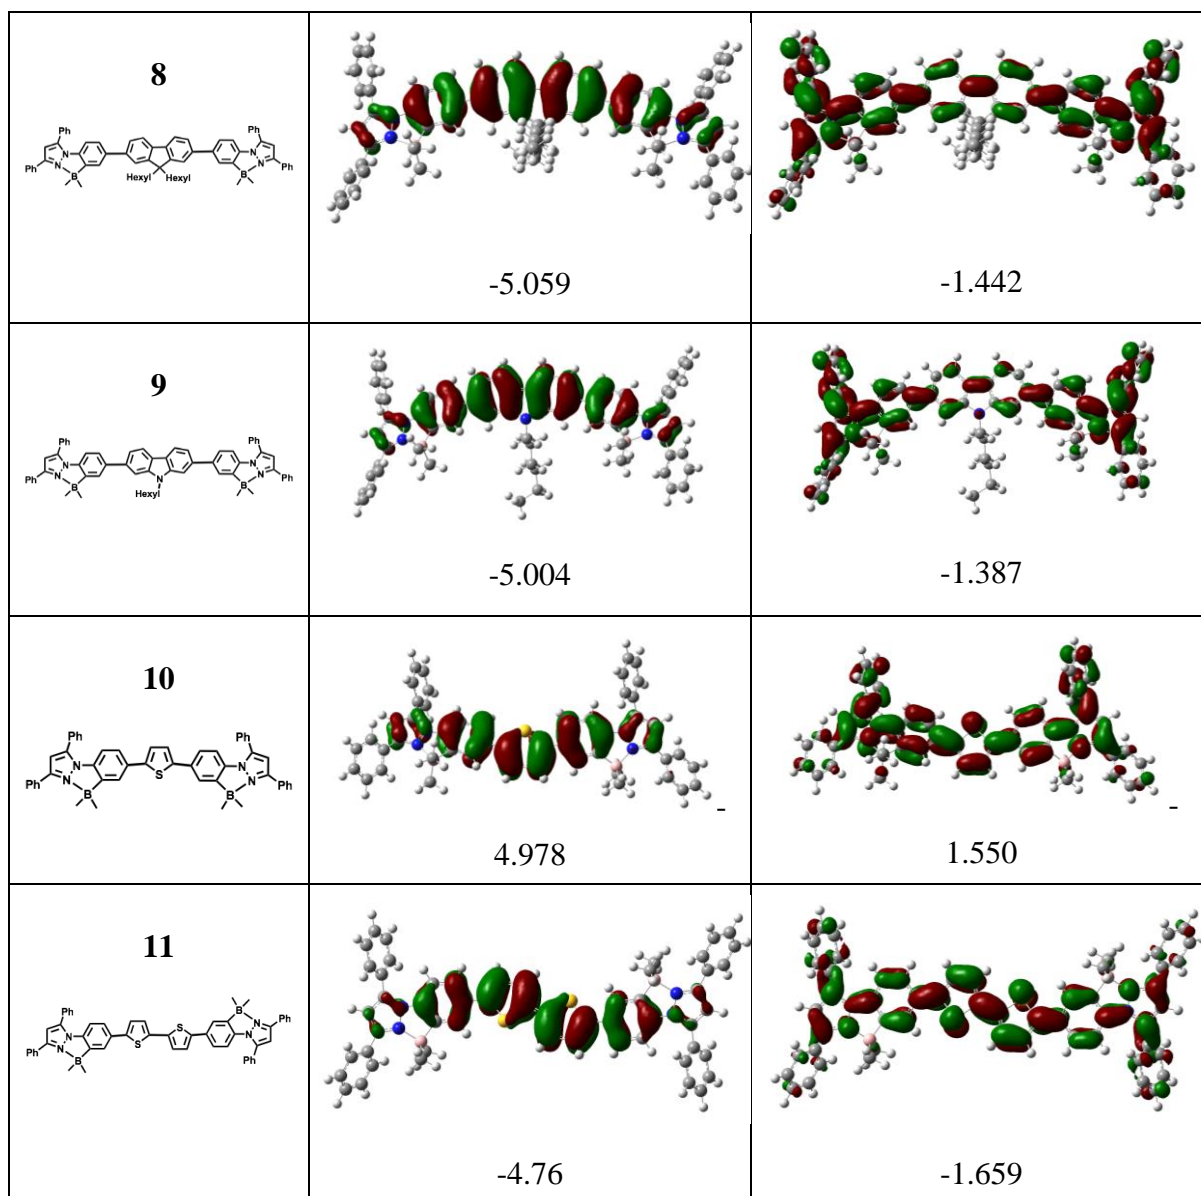



**Table S5.** Calculated electronic transitions for compound **Pz**, **Pz-B**, **4**, **7-11** from TD-DFT (B3LYP) calculations using 6-31G(d) as the basis set.

| Compound              | Transition            | MO contributions          | Energy gap<br>eV (nm)   | Oscillator<br>strength/f |
|-----------------------|-----------------------|---------------------------|-------------------------|--------------------------|
| <b>Pz</b>             | $S_0 \rightarrow S_1$ | HOMO $\rightarrow$ LUMO   | 4.22 (293)              | 0.1696                   |
|                       |                       | HOMO $\rightarrow$ LUMO+1 |                         |                          |
|                       | $S_0 \rightarrow S_2$ | HOMO-4 $\rightarrow$ LUMO | 4.69 (264)              | 0.0657                   |
|                       |                       | HOMO-1 $\rightarrow$ LUMO |                         |                          |
|                       |                       | HOMO $\rightarrow$ LUMO+1 |                         |                          |
|                       |                       | HOMO $\rightarrow$ LUMO+2 |                         |                          |
|                       |                       | HOMO $\rightarrow$ LUMO+3 |                         |                          |
|                       | $S_0 \rightarrow S_3$ | HOMO-1 $\rightarrow$ LUMO | 4.69 (263)              | 0.0926                   |
|                       |                       | HOMO $\rightarrow$ LUMO+1 |                         |                          |
|                       |                       | HOMO $\rightarrow$ LUMO+2 |                         |                          |
|                       |                       | HOMO $\rightarrow$ LUMO+3 |                         |                          |
|                       | <b>Pz-B</b>           | $S_0 \rightarrow S_1$     | HOMO $\rightarrow$ LUMO | 3.89 (318)               |
| $S_0 \rightarrow S_2$ |                       | HOMO-1 $\rightarrow$ LUMO | 4.34 (285)              | 0.0028                   |
|                       |                       | HOMO $\rightarrow$ LUMO+1 |                         |                          |
| $S_0 \rightarrow S_3$ |                       | HOMO-1 $\rightarrow$ LUMO | 4.38 (282)              | 0.1604                   |
|                       |                       | HOMO $\rightarrow$ LUMO+1 |                         |                          |
|                       |                       | HOMO $\rightarrow$ LUMO+2 |                         |                          |

|                           |                       |                             |            |        |
|---------------------------|-----------------------|-----------------------------|------------|--------|
| <b>4</b>                  | $S_0 \rightarrow S_1$ | HOMO $\rightarrow$ LUMO     | 3.27 (378) | 1.0616 |
|                           | $S_0 \rightarrow S_2$ | HOMO-1 $\rightarrow$ LUMO   | 3.60 (343) | 0.0000 |
|                           |                       | HOMO $\rightarrow$ LUMO+1   |            |        |
|                           | $S_0 \rightarrow S_3$ | HOMO-1 $\rightarrow$ LUMO   |            |        |
|                           |                       | HOMO $\rightarrow$ LUMO+1   | 3.86 (320) | 0.0000 |
|                           |                       | HOMO $\rightarrow$ LUMO+9   |            |        |
| <b>7</b>                  | $S_0 \rightarrow S_1$ | HOMO $\rightarrow$ LUMO     | 3.11 (398) | 0.7530 |
|                           | $S_0 \rightarrow S_2$ | HOMO $\rightarrow$ LUMO+1   | 3.28 (376) | 0.0005 |
|                           | $S_0 \rightarrow S_3$ | HOMO-2 $\rightarrow$ LUMO+1 | 3.76 (329) | 0.4457 |
|                           |                       | HOMO-1 $\rightarrow$ LUMO   |            |        |
| <b>8</b>                  | $S_0 \rightarrow S_1$ | HOMO-1 $\rightarrow$ LUMO+1 | 3.20 (387) | 1.5103 |
|                           |                       | HOMO $\rightarrow$ LUMO     |            |        |
|                           | $S_0 \rightarrow S_2$ | HOMO-1 $\rightarrow$ LUMO   | 3.40 (363) | 0.0187 |
|                           |                       | HOMO $\rightarrow$ LUMO+1   |            |        |
|                           | $S_0 \rightarrow S_3$ | HOMO-2 $\rightarrow$ LUMO+1 | 3.81 (325) | 0.0051 |
|                           |                       | HOMO-1 $\rightarrow$ LUMO   |            |        |
| HOMO $\rightarrow$ LUMO+1 |                       |                             |            |        |
| <b>9</b>                  | $S_0 \rightarrow S_1$ | HOMO-2 $\rightarrow$ LUMO+1 | 3.20 (387) | 1.3715 |
|                           |                       | HOMO $\rightarrow$ LUMO     |            |        |
|                           | $S_0 \rightarrow S_2$ | HOMO-1 $\rightarrow$ LUMO   | 3.34 (370) | 0.0020 |
|                           |                       | HOMO $\rightarrow$ LUMO+1   |            |        |
|                           | $S_0 \rightarrow S_3$ | HOMO-2 $\rightarrow$ LUMO   | 3.38 (366) | 0.0349 |
| HOMO-1 $\rightarrow$ LUMO |                       |                             |            |        |

|           |                                |             |            |        |
|-----------|--------------------------------|-------------|------------|--------|
|           |                                | HOMO→LUMO+1 |            |        |
| <b>10</b> | S <sub>0</sub> →S <sub>1</sub> | HOMO→LUMO   | 3.01 (410) | 1.3367 |
|           | S <sub>0</sub> →S <sub>2</sub> | HOMO→LUMO+1 | 3.30 (374) | 0.0082 |
|           | S <sub>0</sub> →S <sub>3</sub> | HOMO→LUMO+2 | 3.80 (325) | 0.2755 |
| <b>11</b> | S <sub>0</sub> →S <sub>1</sub> | HOMO→LUMO   | 2.72 (454) | 1.7669 |
|           | S <sub>0</sub> →S <sub>2</sub> | HOMO→LUMO+1 | 3.05 (405) | 0.0000 |
|           | S <sub>0</sub> →S <sub>3</sub> | HOMO→LUMO+2 | 3.41 (362) | 0.2876 |

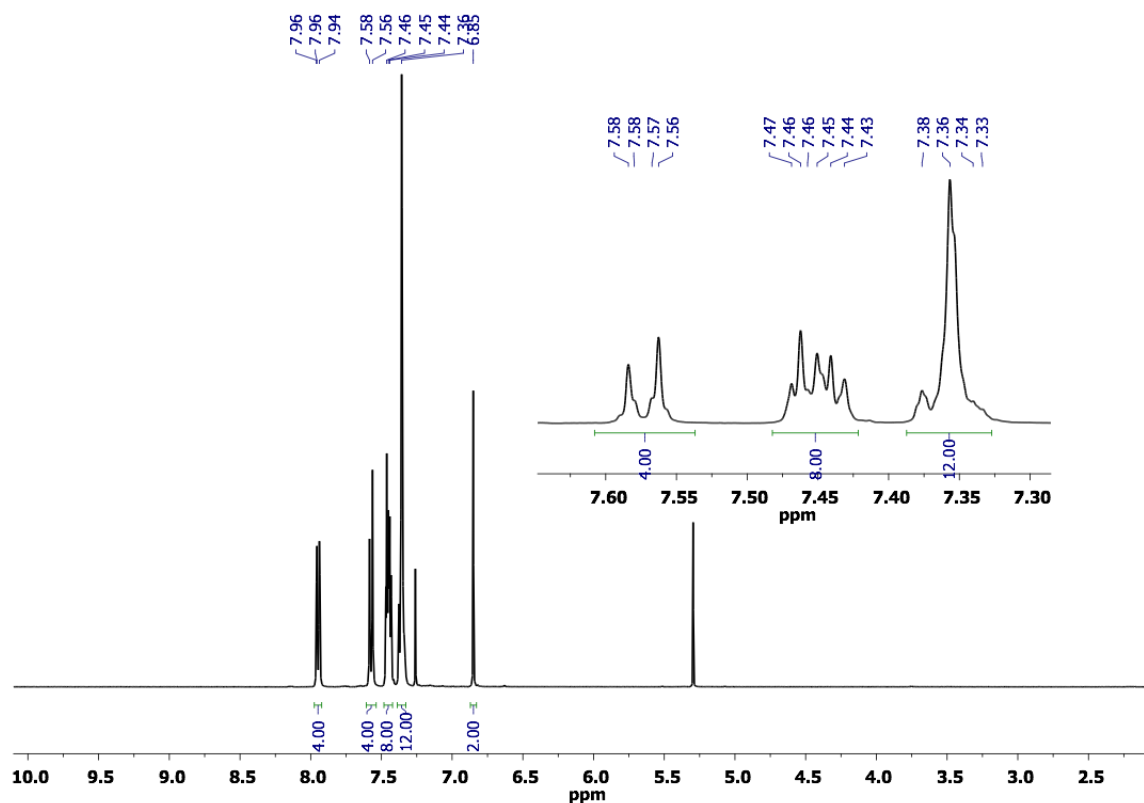

**Figure S6.** <sup>1</sup>H NMR spectrum of compound 3

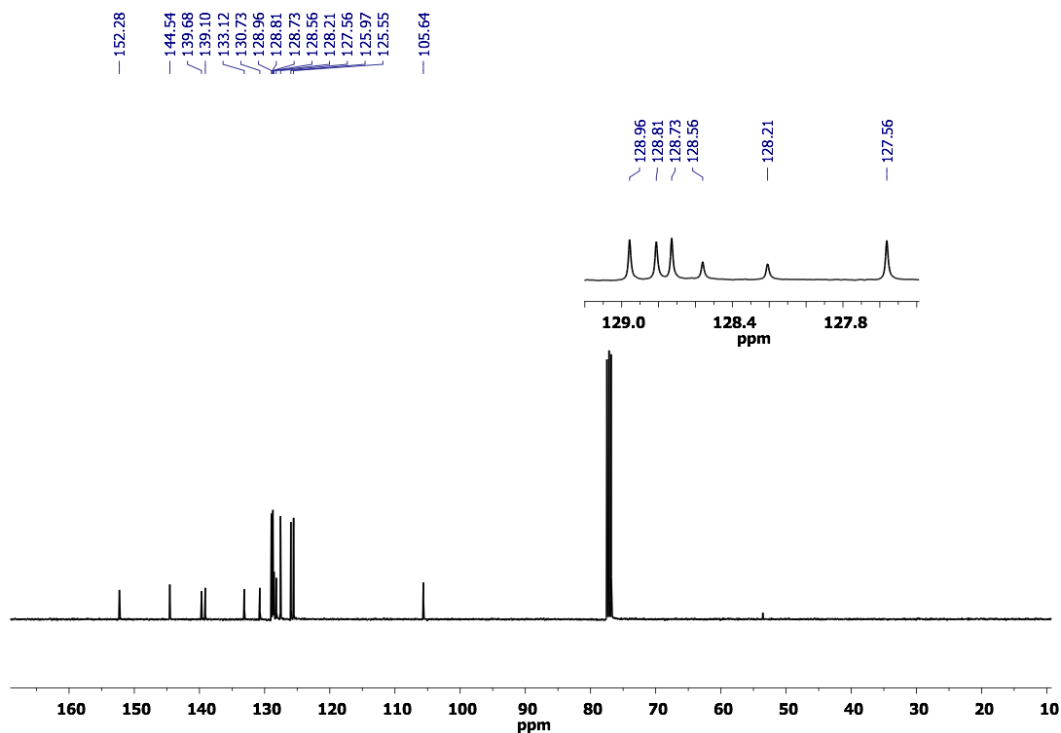

**Figure S7.**  $^{13}\text{C}$  NMR spectrum of compound 3

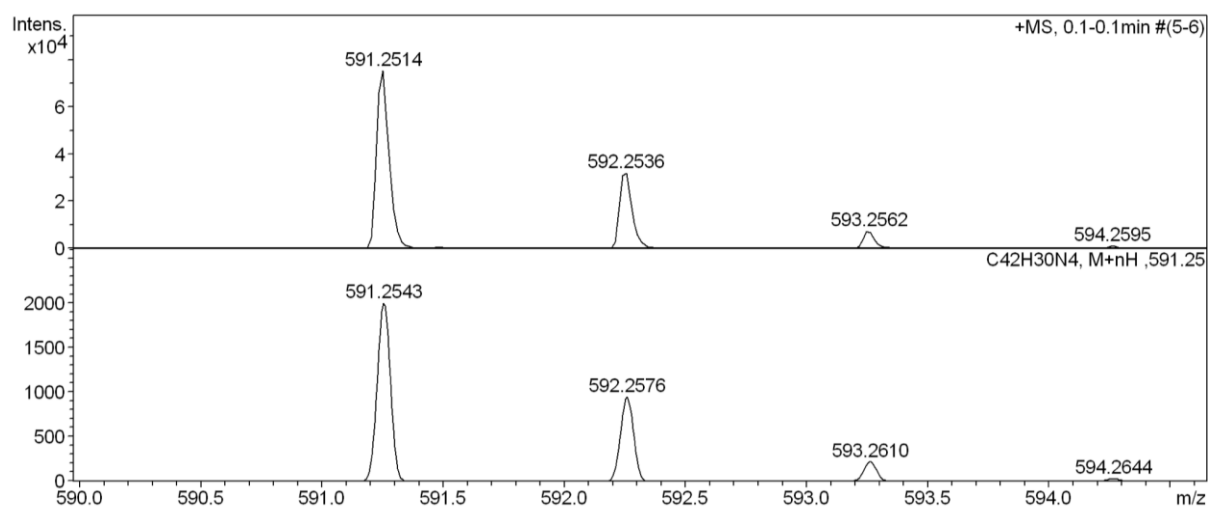

**Figure S8.** HRMS of compound 3

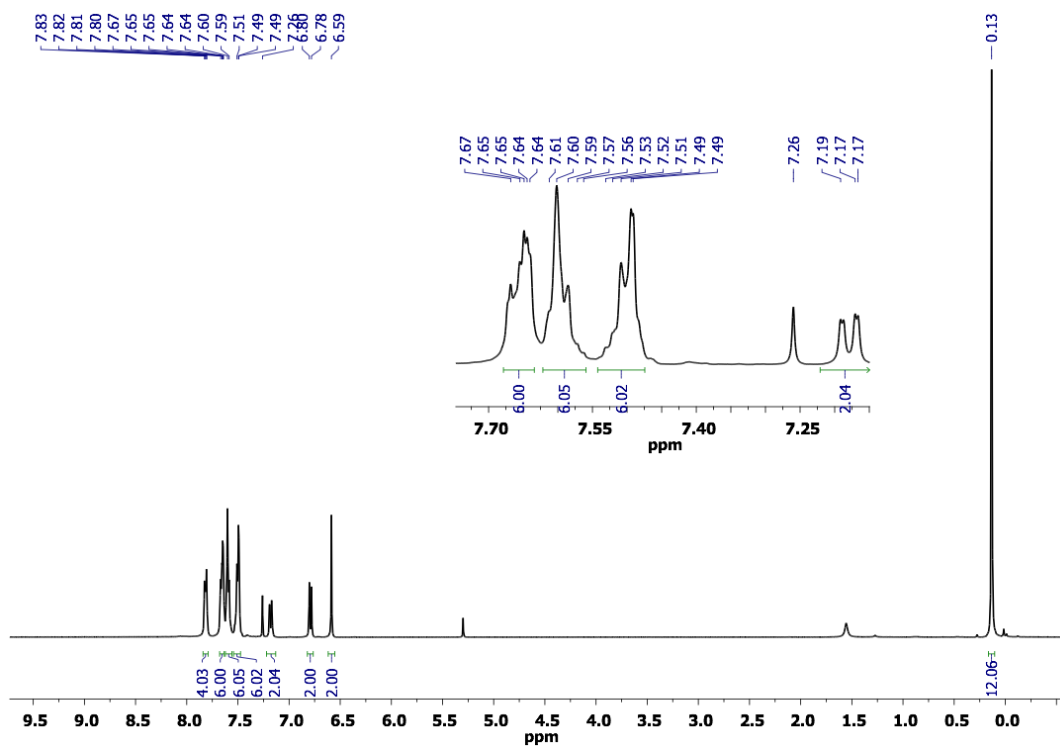

Figure S9.  $^1\text{H}$  NMR spectrum of compound 4

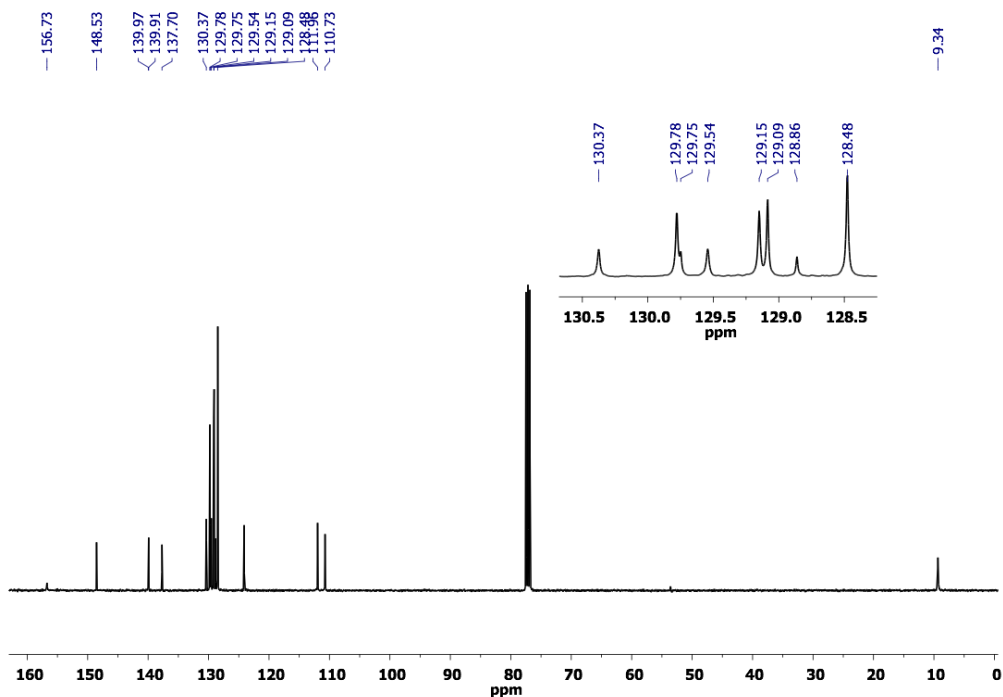

Figure S10.  $^{13}\text{C}$  NMR spectrum of compound 4

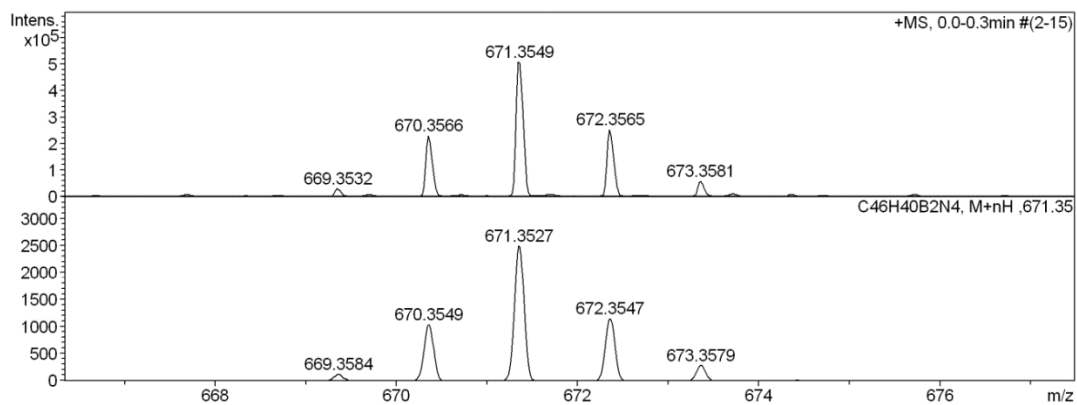

Figure S11. HRMS of compound 4

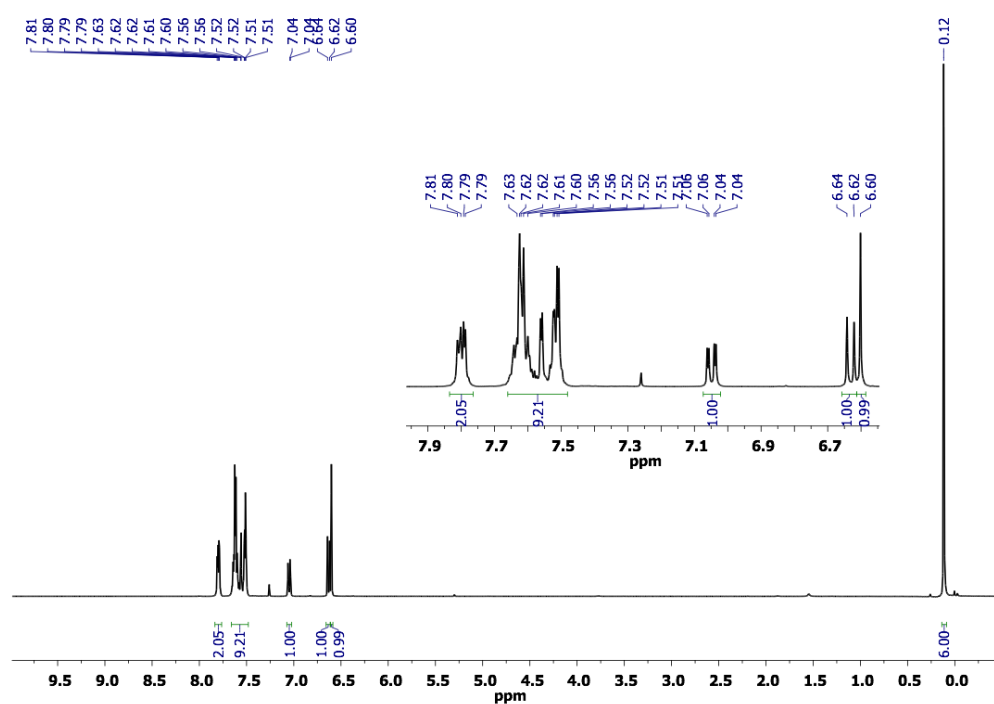

Figure S12. <sup>1</sup>H NMR spectrum of compound 5

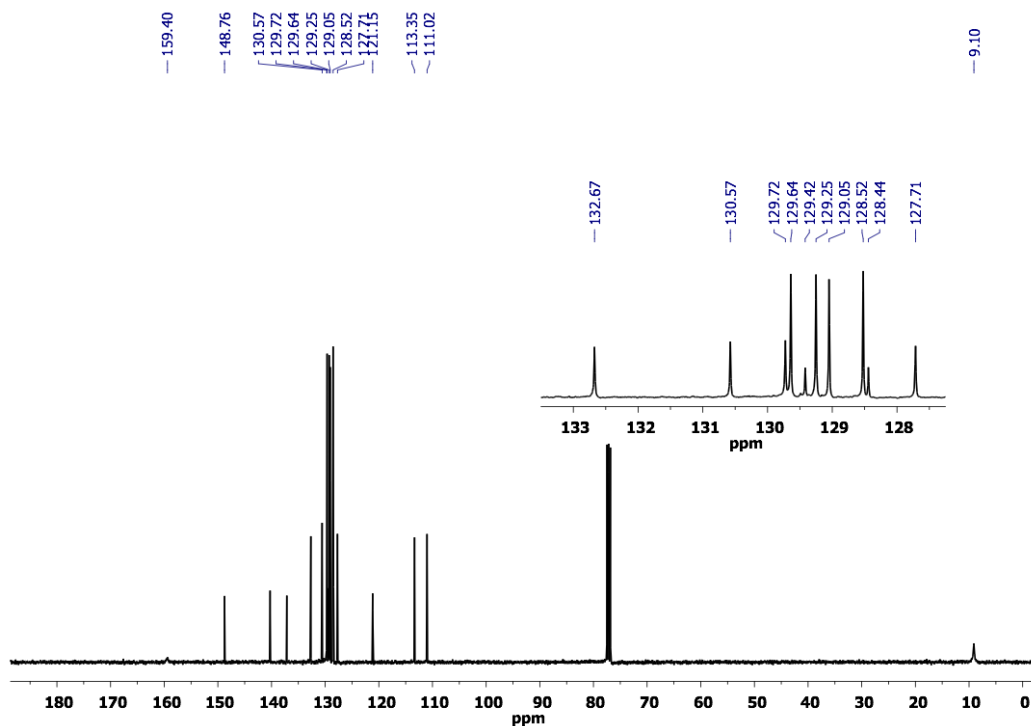

**Figure S13.**  $^{13}\text{C}$  NMR spectrum of compound **5**

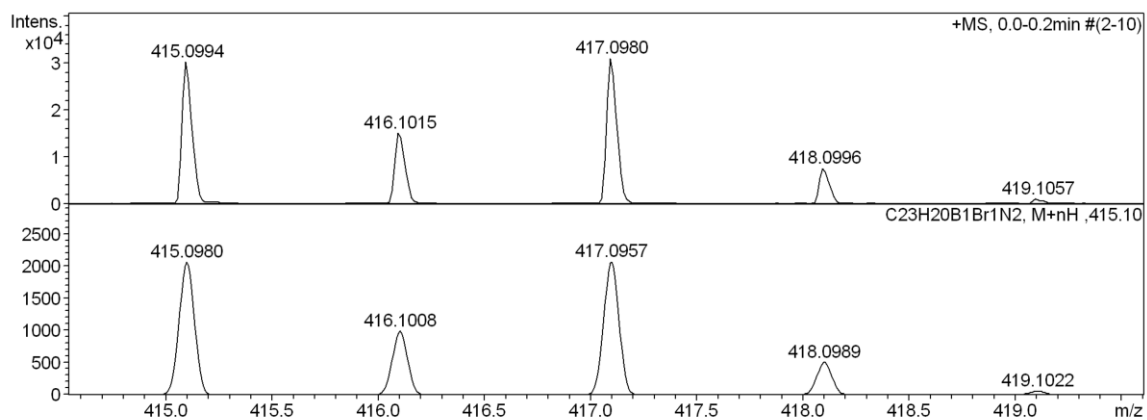

**Figure S14.** HRMS of compound **5**

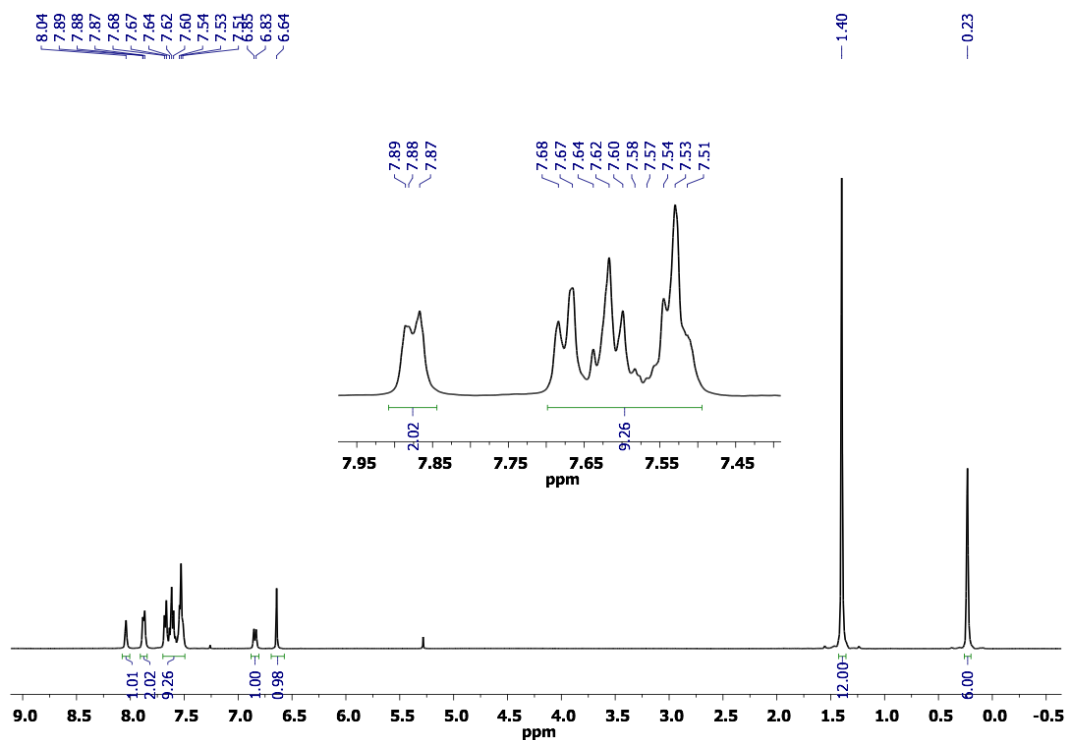

Figure S15.  $^1\text{H}$  NMR spectrum of compound **6**

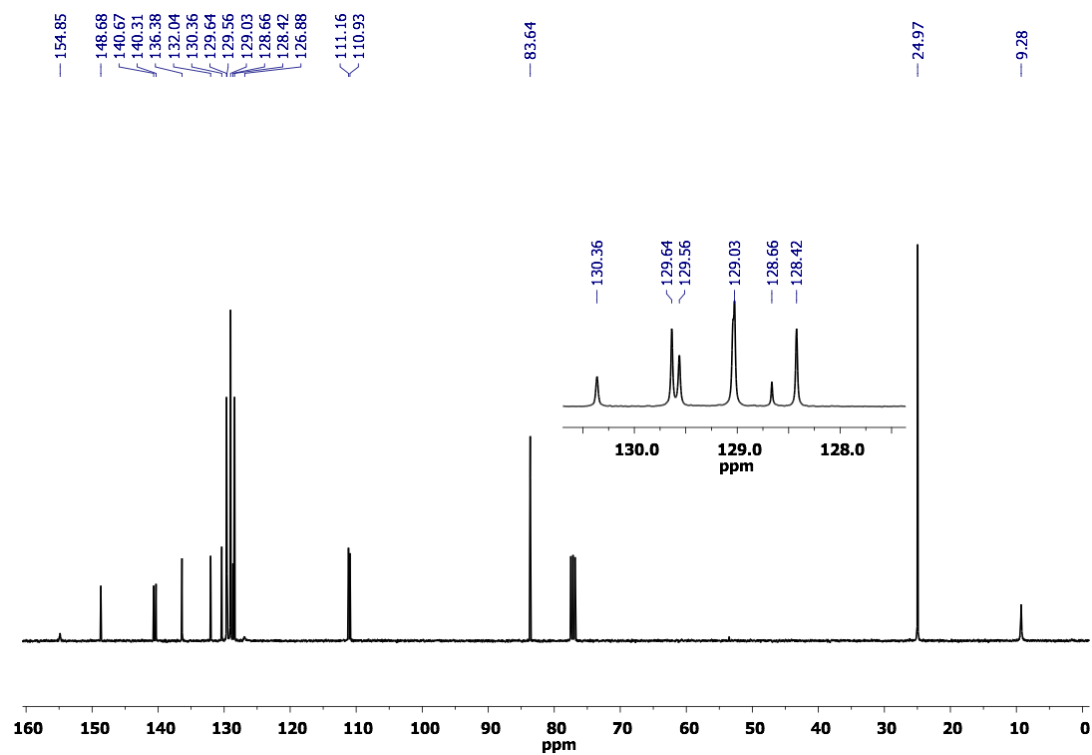

Figure S16.  $^{13}\text{C}$  NMR spectrum of compound **6**



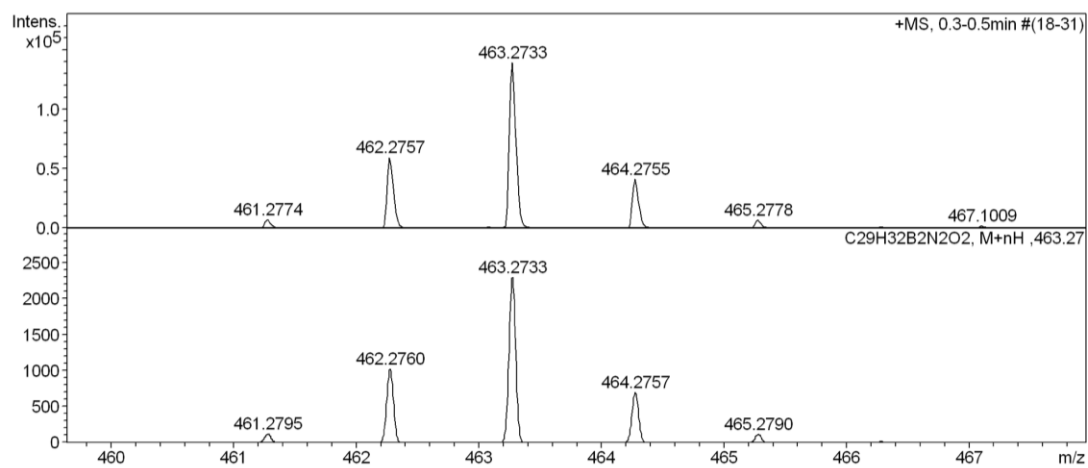

Figure S17. HRMS of compound 6

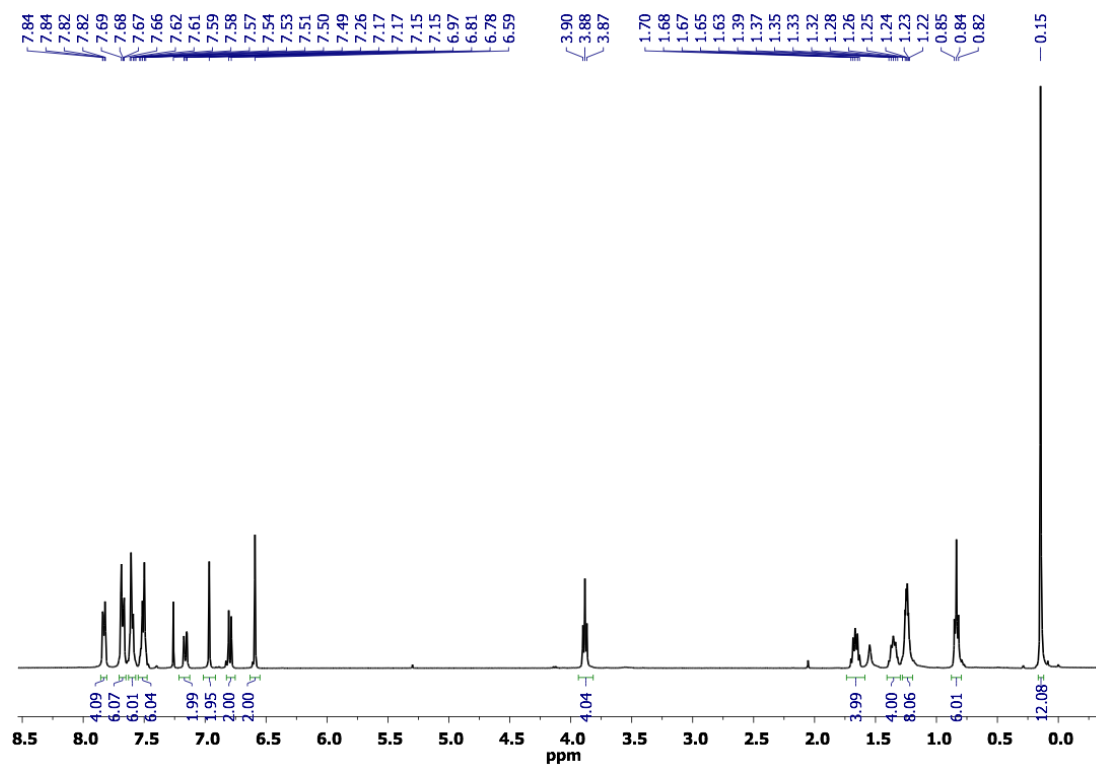

Figure S18. <sup>1</sup>H NMR spectrum of compound 7

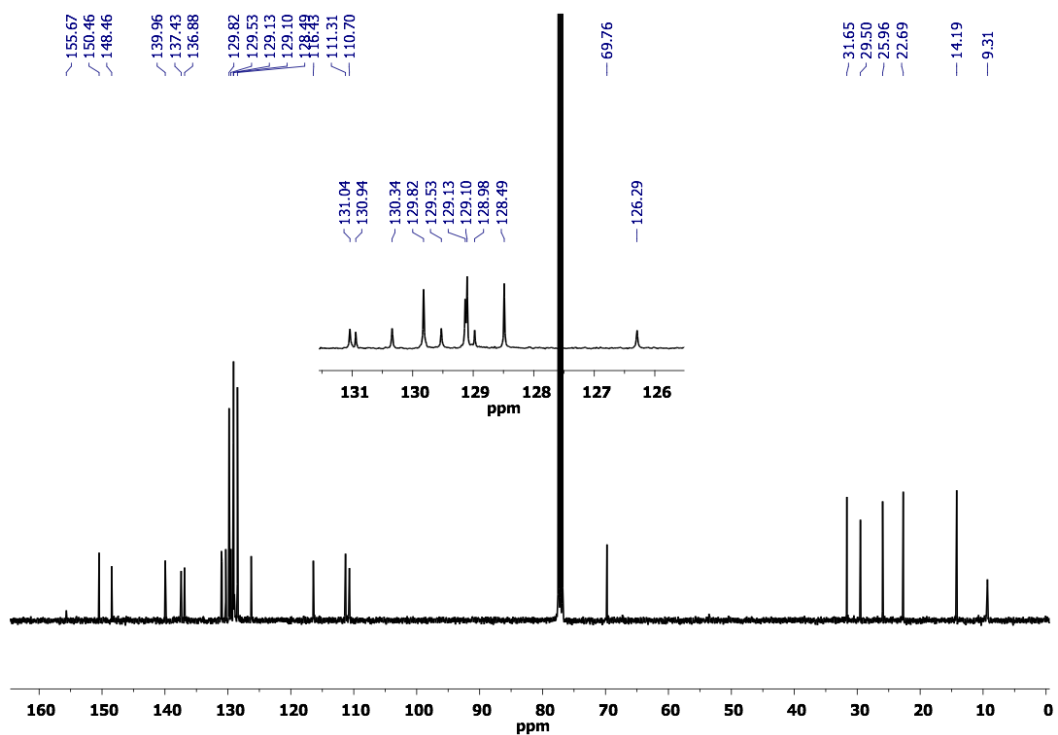

**Figure S19.**  $^{13}\text{C}$  NMR spectrum of compound 7

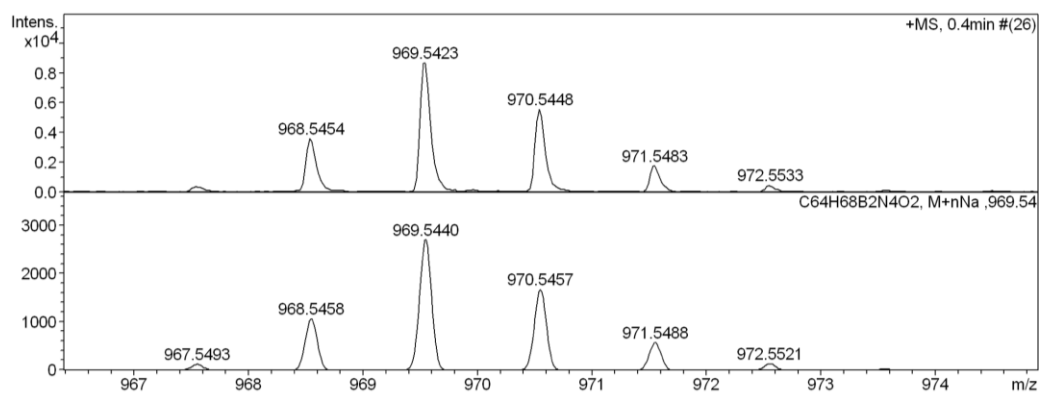

**Figure S20.** HRMS of compound 7

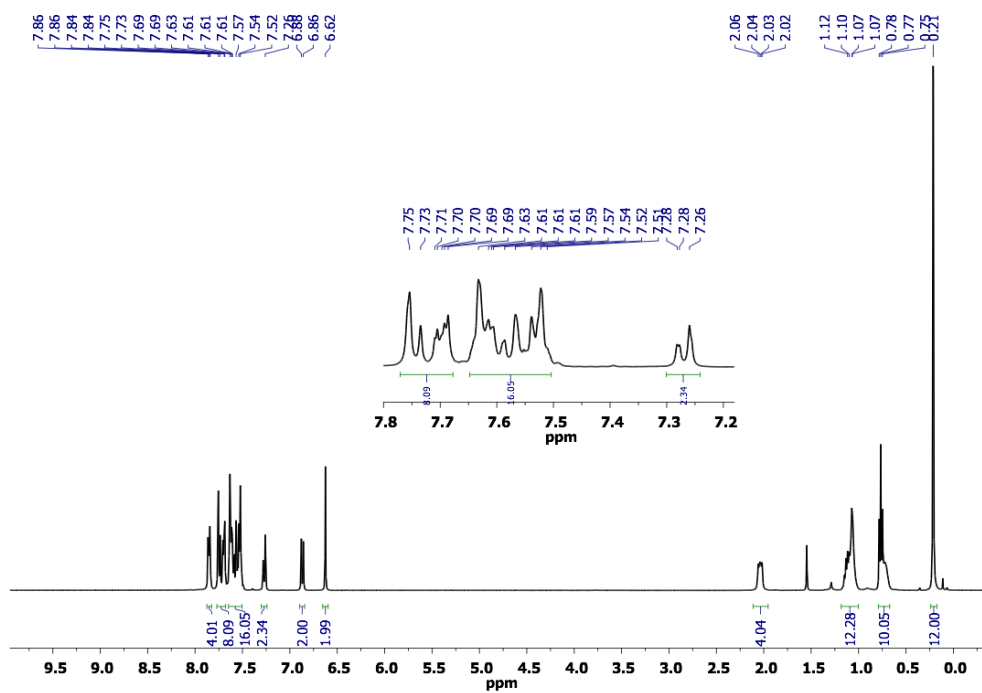

Figure S21.  $^1\text{H}$  NMR spectrum of compound **8**

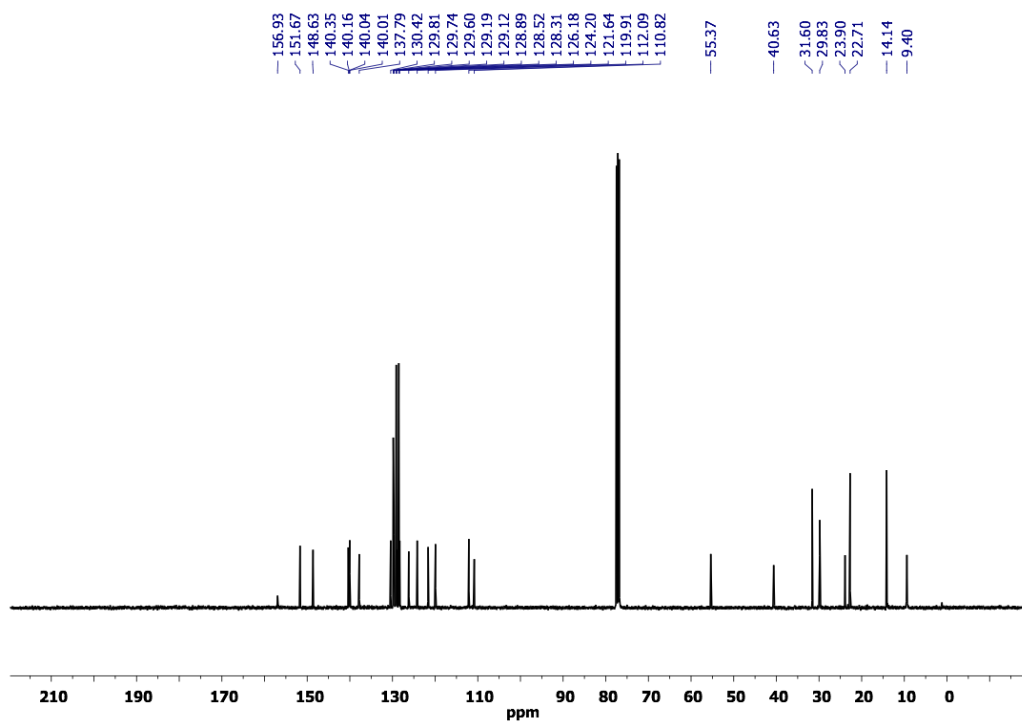

Figure S22.  $^{13}\text{C}$  NMR spectrum of compound **8**

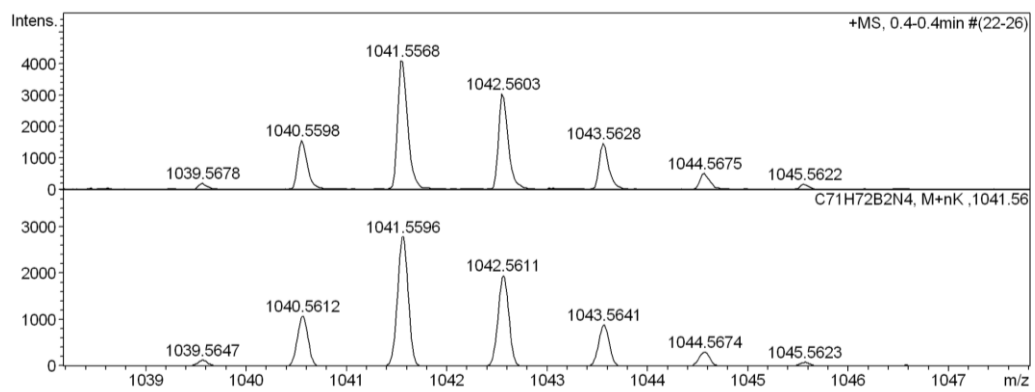

Figure S23. HRMS of compound 8

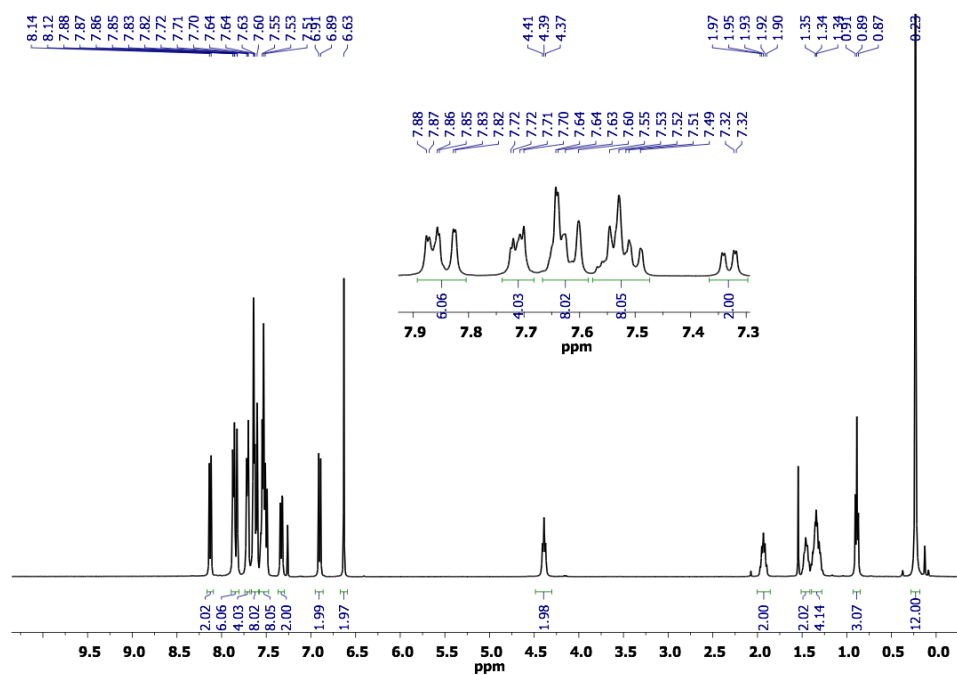

Figure S24. <sup>1</sup>H NMR spectrum of compound 9

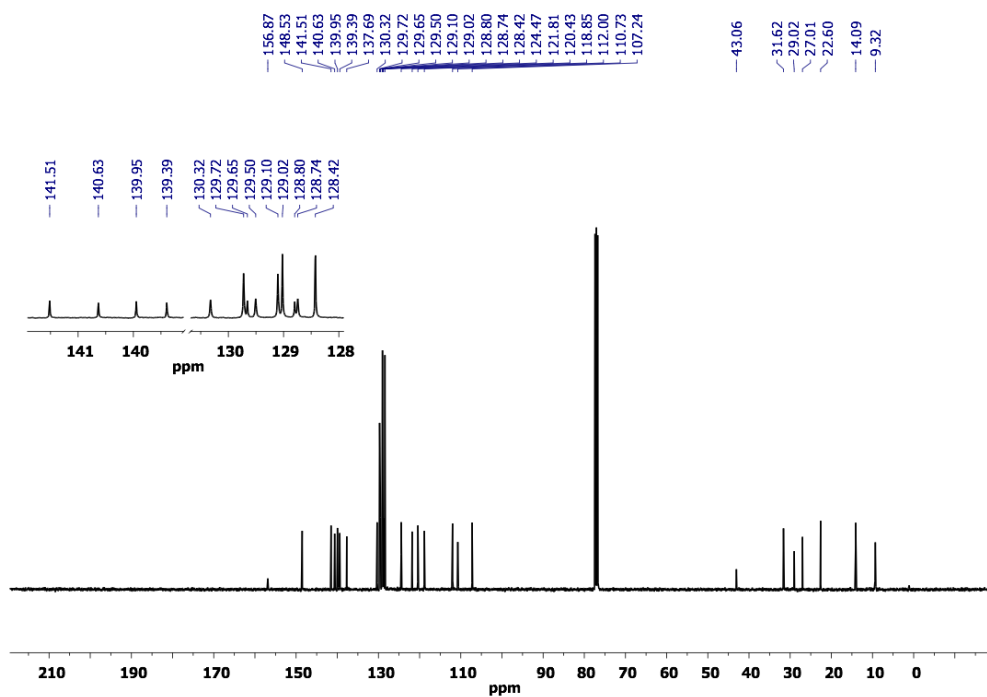

Figure S25.  $^{13}\text{C}$  NMR spectrum of compound **9**

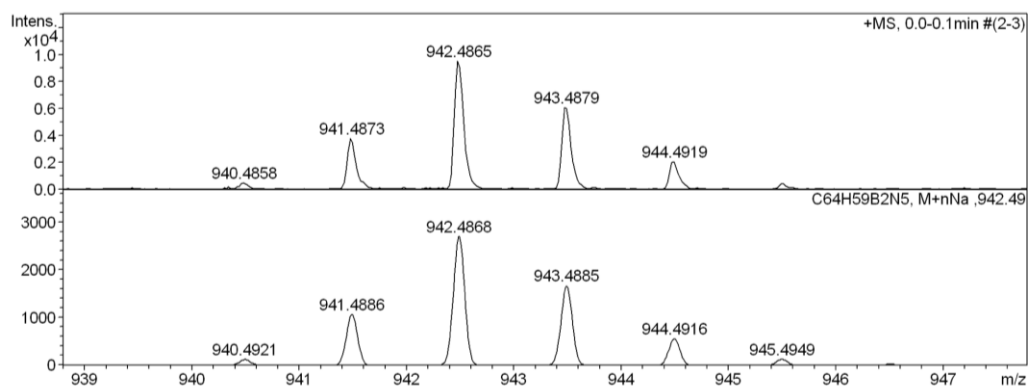

Figure S26. HRMS of compound **9**

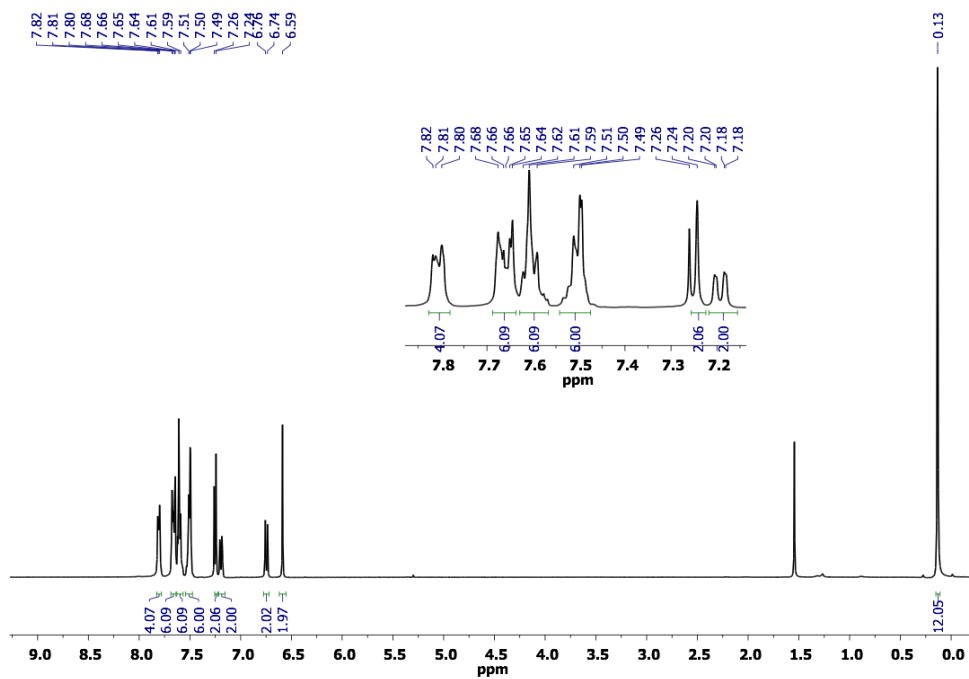

Figure S27.  $^1\text{H}$  NMR spectrum of compound **10**

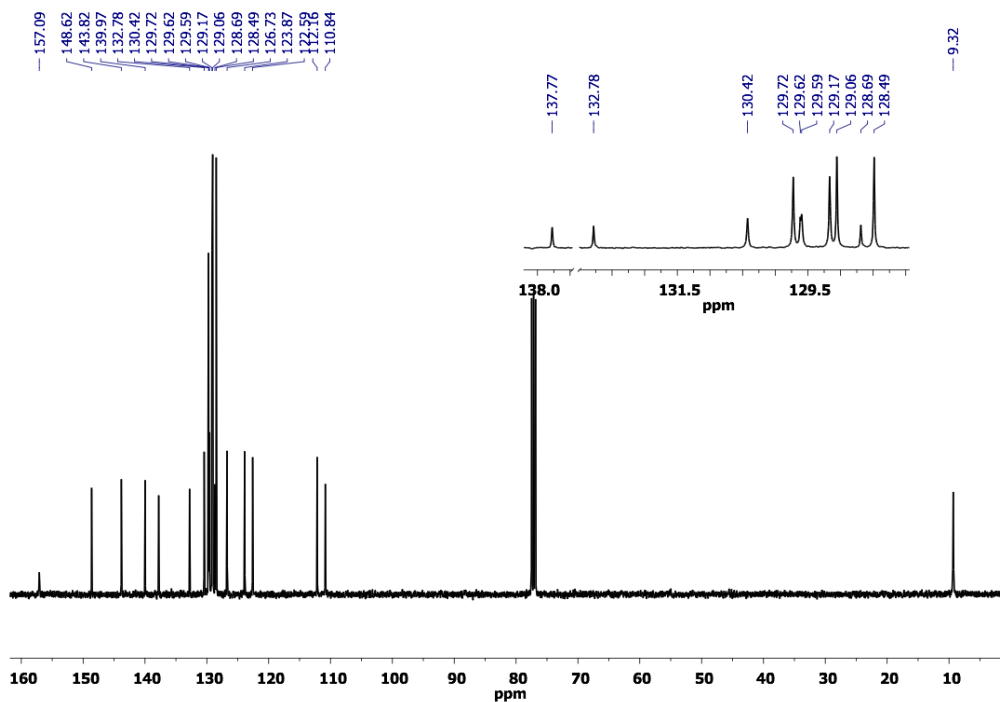

Figure S28.  $^{13}\text{C}$  NMR spectrum of compound **10**

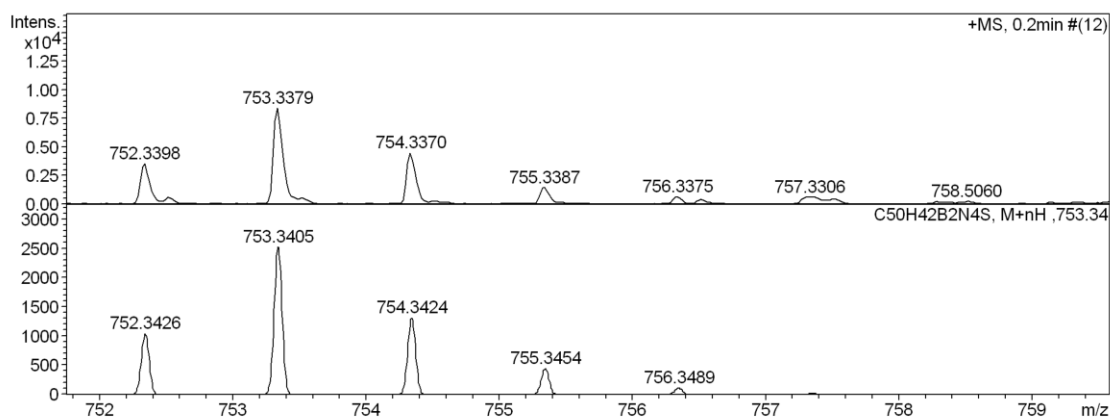

Figure S29. HRMS of compound 10

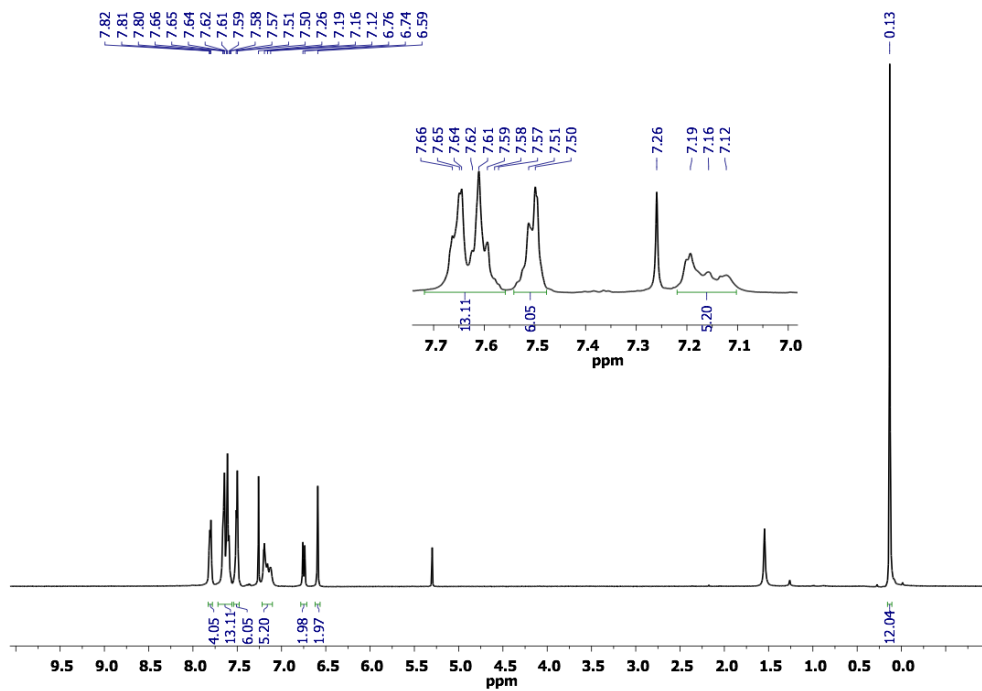

Figure S30. <sup>1</sup>H NMR spectrum of compound 11

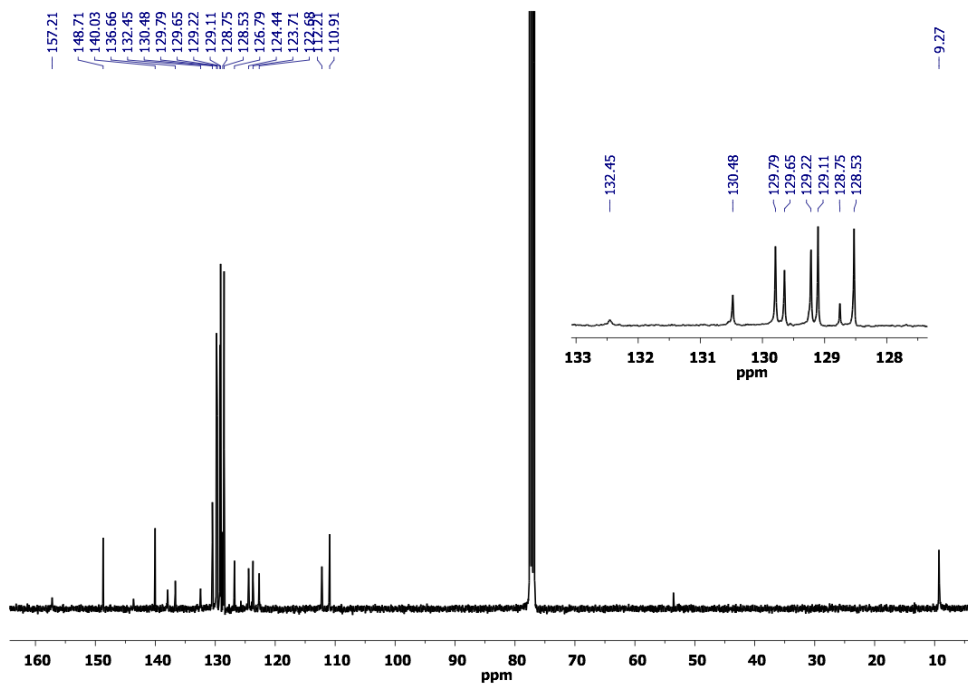

**Figure S31.**  $^{13}\text{C}$  NMR spectrum of compound 11

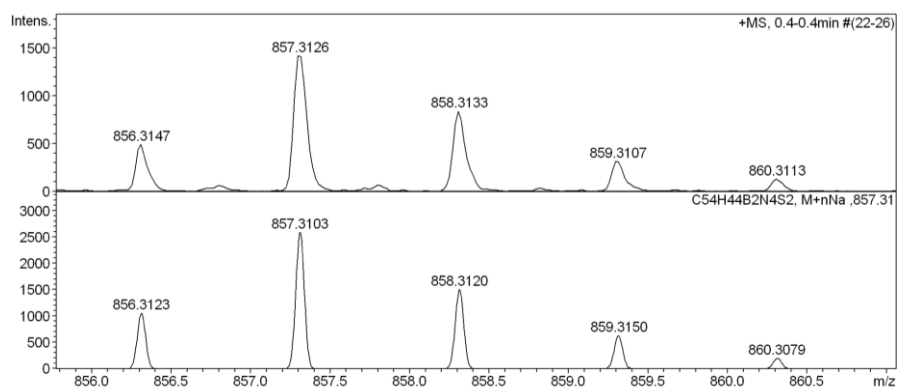

**Figure S32.** HRMS of compound 11



Optimized x,y,z coordinates for compounds **4** and **7-11** calculated on Gaussian 03 at the B3LYP//6-31g(d) level

Compound **4**

|   |           |           |           |
|---|-----------|-----------|-----------|
| N | -3.738925 | -3.918374 | 0.916289  |
| N | -3.111384 | -3.850419 | -0.297380 |
| C | -7.451469 | -6.045670 | 3.877468  |
| H | -8.148893 | -6.365493 | 4.646915  |
| C | -7.913473 | -5.738265 | 2.596251  |
| H | -8.972434 | -5.813217 | 2.364463  |
| C | -7.018357 | -5.326672 | 1.610795  |
| H | -7.380923 | -5.072837 | 0.618557  |
| C | -5.647301 | -5.211393 | 1.893823  |
| C | -4.728965 | -4.823770 | 0.807583  |
| C | -2.139931 | -2.108982 | 0.879976  |
| C | -1.271165 | -1.026051 | 0.994712  |
| H | -1.239374 | -0.510076 | 1.948769  |
| C | -0.461609 | -0.582363 | -0.071974 |
| C | -2.174212 | -2.772286 | -0.350510 |
| C | -3.681964 | -4.718937 | -1.181422 |
| C | -3.220116 | -4.984405 | -2.557266 |
| C | -4.139095 | -4.925791 | -3.615871 |
| H | -5.161202 | -4.617000 | -3.416342 |
| C | -3.742560 | -5.244716 | -4.914409 |
| H | -4.462441 | -5.187944 | -5.726158 |
| C | -2.425406 | -5.628512 | -5.170600 |
| H | -2.116210 | -5.875146 | -6.182509 |
| C | -1.899473 | -5.383253 | -2.821627 |
| H | -1.186329 | -5.453070 | -2.005321 |
| C | -1.505913 | -5.697718 | -4.121129 |
| H | -0.481618 | -6.005071 | -4.312615 |
| C | -1.414864 | -2.377415 | -1.448978 |
| H | -1.470389 | -2.881429 | -2.405301 |
| C | -0.567091 | -1.284156 | -1.290771 |
| H | 0.018970  | -0.981989 | -2.150230 |
| C | -2.390348 | -3.398033 | 3.230088  |
| H | -1.751743 | -2.627859 | 3.686098  |
| H | -1.725293 | -4.234049 | 2.970876  |
| H | -3.068028 | -3.738481 | 4.023475  |
| C | -4.724448 | -5.338815 | -0.501053 |
| H | -5.351799 | -6.130026 | -0.883643 |
| C | -6.089118 | -5.943216 | 4.164263  |
| H | -5.720795 | -6.190248 | 5.156187  |
| C | -5.190230 | -5.533442 | 3.180402  |
| H | -4.131140 | -5.477856 | 3.401406  |
| C | -4.399501 | -1.769729 | 2.358215  |
| H | -4.019814 | -0.925007 | 2.950523  |
| H | -5.148779 | -2.276176 | 2.981635  |
| H | -4.923584 | -1.340150 | 1.493665  |

|   |           |           |           |
|---|-----------|-----------|-----------|
| B | -3.166303 | -2.747868 | 1.953313  |
| N | 3.738925  | 3.918374  | -0.916289 |
| N | 3.111384  | 3.850419  | 0.297380  |
| C | 7.451469  | 6.045670  | -3.877468 |
| H | 8.148893  | 6.365493  | -4.646915 |
| C | 7.913473  | 5.738265  | -2.596251 |
| H | 8.972434  | 5.813217  | -2.364463 |
| C | 7.018357  | 5.326672  | -1.610795 |
| H | 7.380923  | 5.072837  | -0.618557 |
| C | 5.647301  | 5.211393  | -1.893823 |
| C | 4.728965  | 4.823770  | -0.807583 |
| C | 2.139931  | 2.108982  | -0.879976 |
| C | 1.271165  | 1.026051  | -0.994712 |
| H | 1.239374  | 0.510076  | -1.948769 |
| C | 0.461609  | 0.582363  | 0.071974  |
| C | 2.174212  | 2.772286  | 0.350510  |
| C | 3.681964  | 4.718937  | 1.181422  |
| C | 3.220116  | 4.984405  | 2.557266  |
| C | 4.139095  | 4.925791  | 3.615871  |
| H | 5.161202  | 4.617000  | 3.416342  |
| C | 3.742560  | 5.244716  | 4.914409  |
| H | 4.462441  | 5.187944  | 5.726158  |
| C | 2.425406  | 5.628512  | 5.170600  |
| H | 2.116210  | 5.875146  | 6.182509  |
| C | 1.899473  | 5.383253  | 2.821627  |
| H | 1.186329  | 5.453070  | 2.005321  |
| C | 1.505913  | 5.697718  | 4.121129  |
| H | 0.481618  | 6.005071  | 4.312615  |
| C | 1.414864  | 2.377415  | 1.448978  |
| H | 1.470389  | 2.881429  | 2.405301  |
| C | 0.567091  | 1.284156  | 1.290771  |
| H | -0.018970 | 0.981989  | 2.150230  |
| C | 2.390348  | 3.398033  | -3.230088 |
| H | 1.751743  | 2.627859  | -3.686098 |
| H | 1.725293  | 4.234049  | -2.970876 |
| H | 3.068028  | 3.738481  | -4.023475 |
| C | 4.724448  | 5.338815  | 0.501053  |
| H | 5.351799  | 6.130026  | 0.883643  |
| C | 6.089118  | 5.943216  | -4.164263 |
| H | 5.720795  | 6.190248  | -5.156187 |
| C | 5.190230  | 5.533442  | -3.180402 |
| H | 4.131140  | 5.477856  | -3.401406 |
| C | 4.399501  | 1.769729  | -2.358215 |
| H | 4.019814  | 0.925007  | -2.950523 |
| H | 5.148779  | 2.276176  | -2.981635 |
| H | 4.923584  | 1.340150  | -1.493665 |
| B | 3.166303  | 2.747868  | -1.953313 |

Compound **7** (hexyl replaced by –Me)

|   |            |           |           |
|---|------------|-----------|-----------|
| C | -0.827145  | 1.101095  | 0.442785  |
| C | -1.417464  | -0.172133 | 0.444808  |
| C | -0.556102  | -1.289719 | 0.443441  |
| C | 0.827220   | -1.101144 | 0.442789  |
| C | 1.417510   | 0.172064  | 0.444799  |
| C | 0.556154   | 1.289659  | 0.443397  |
| C | -2.900205  | -0.282214 | 0.432971  |
| C | -3.581828  | -1.192010 | 1.262503  |
| C | -4.973627  | -1.247039 | 1.290496  |
| C | -5.673936  | -0.368968 | 0.464393  |
| C | -5.054464  | 0.535479  | -0.404690 |
| C | -3.660511  | 0.565454  | -0.394905 |
| N | -7.096038  | -0.274254 | 0.329535  |
| C | -8.186492  | -0.968795 | 0.765184  |
| C | -9.269217  | -0.495950 | 0.031006  |
| C | -8.782096  | 0.508032  | -0.824204 |
| N | -7.456226  | 0.632709  | -0.628570 |
| C | -8.204644  | -1.961199 | 1.856478  |
| C | -7.721531  | -1.647761 | 3.137662  |
| C | -7.815645  | -2.576605 | 4.172376  |
| C | -8.401682  | -3.824454 | 3.946337  |
| C | -8.895440  | -4.139122 | 2.679438  |
| C | -8.799713  | -3.213392 | 1.640644  |
| B | -6.119193  | 1.373155  | -1.286535 |
| C | -6.075686  | 1.041101  | -2.876580 |
| C | -9.577468  | 1.308705  | -1.773192 |
| C | -10.510146 | 0.653782  | -2.594248 |
| C | -11.313545 | 1.378859  | -3.472151 |
| C | -11.200722 | 2.768878  | -3.538900 |
| C | -10.283766 | 3.428497  | -2.718666 |
| C | -9.479305  | 2.706548  | -1.837935 |
| O | -1.144280  | -2.529008 | 0.433892  |
| C | -0.314900  | -3.670943 | 0.312687  |
| C | 2.900228   | 0.282173  | 0.432921  |
| C | 3.660516   | -0.565459 | -0.394957 |
| C | 5.054487   | -0.535455 | -0.404770 |
| C | 5.673928   | 0.368987  | 0.464329  |
| C | 4.973605   | 1.247009  | 1.290505  |
| C | 3.581823   | 1.191930  | 1.262532  |
| B | 6.119248   | -1.372866 | -1.286823 |
| C | 6.080289   | -2.964710 | -0.939299 |
| N | 7.096028   | 0.274367  | 0.329424  |
| N | 7.456239   | -0.632731 | -0.628534 |
| C | 8.782142   | -0.508156 | -0.824066 |
| C | 9.269268   | 0.495782  | 0.031183  |
| C | 8.186497   | 0.968772  | 0.765204  |
| C | 9.577532   | -1.308956 | -1.772930 |
| C | 9.479451   | -2.706822 | -1.837385 |

|   |            |           |           |
|---|------------|-----------|-----------|
| C | 10.283932  | -3.428898 | -2.717990 |
| C | 11.200826  | -2.769388 | -3.538386 |
| C | 11.313574  | -1.379352 | -3.471917 |
| C | 10.510153  | -0.654146 | -2.594137 |
| C | 8.204558   | 1.961291  | 1.856422  |
| C | 7.721844   | 1.647719  | 3.137725  |
| C | 7.815845   | 2.576641  | 4.172379  |
| C | 8.401372   | 3.824696  | 3.946146  |
| C | 8.894733   | 4.139494  | 2.679127  |
| C | 8.799123   | 3.213677  | 1.640392  |
| O | 1.144362   | 2.528942  | 0.433771  |
| C | 0.314923   | 3.670842  | 0.312595  |
| C | -6.080335  | 2.964781  | -0.937825 |
| C | 6.075904   | -1.039823 | -2.876720 |
| H | -6.346958  | 3.199193  | 0.102660  |
| H | -6.717576  | 3.570792  | -1.594647 |
| H | -5.055101  | 3.333778  | -1.084510 |
| H | 11.825698  | -3.335259 | -4.224014 |
| H | 10.197394  | -4.511292 | -2.757119 |
| H | 8.784487   | -3.224520 | -1.187247 |
| H | 3.141172   | -1.242965 | -1.069061 |
| H | -3.015456  | -1.863908 | 1.896076  |
| H | -5.472616  | -1.957640 | 1.936949  |
| H | -7.279262  | -0.672697 | 3.320316  |
| H | -7.438285  | -2.321835 | 5.158835  |
| H | -8.474854  | -4.546288 | 4.755067  |
| H | 8.474467   | 4.546590  | 4.754829  |
| H | 7.438800   | 2.321782  | 5.158935  |
| H | 7.279960   | 0.672504  | 3.320500  |
| H | 5.472604   | 1.957585  | 1.936978  |
| H | 3.015415   | 1.863708  | 1.896219  |
| H | -10.301255 | -0.785672 | 0.161233  |
| H | -9.351806  | -5.107973 | 2.496416  |
| H | -9.174829  | -3.460295 | 0.651586  |
| H | -10.587111 | -0.429230 | -2.554808 |
| H | -12.023363 | 0.857136  | -4.108336 |
| H | -11.825586 | 3.334644  | -4.224621 |
| H | -10.197155 | 4.510877  | -2.758017 |
| H | -8.784301  | 3.224337  | -1.187914 |
| H | -3.141163  | 1.242937  | -1.069016 |
| H | -5.137061  | 1.417573  | -3.307431 |
| H | -6.890820  | 1.527174  | -3.429717 |
| H | -6.117789  | -0.033205 | -3.101866 |
| H | 1.489096   | -1.958191 | 0.459702  |
| H | 5.137451   | -1.416260 | -3.307968 |
| H | 6.891270   | -1.525417 | -3.429945 |
| H | 6.117838   | 0.034622  | -3.101357 |
| H | 12.023345  | -0.857713 | -4.108223 |
| H | 10.587068  | 0.428878  | -2.554908 |
| H | 10.301310  | 0.785468  | 0.161467  |

|   |           |           |           |
|---|-----------|-----------|-----------|
| H | 9.173956  | 3.460658  | 0.651246  |
| H | 9.350697  | 5.108506  | 2.495964  |
| H | 5.055010  | -3.333509 | -1.086183 |
| H | 6.346961  | -3.199980 | 0.100985  |
| H | 6.717445  | -3.570234 | -1.596645 |
| H | -1.489017 | 1.958139  | 0.459713  |
| H | 0.289676  | -3.636918 | -0.603442 |
| H | 0.352811  | -3.785525 | 1.177606  |
| H | -0.991671 | -4.526651 | 0.266741  |
| H | -0.289684 | 3.636790  | -0.603510 |
| H | -0.352763 | 3.785380  | 1.177541  |
| H | 0.991654  | 4.526579  | 0.266622  |

### Compound 8

|   |           |           |           |
|---|-----------|-----------|-----------|
| N | 9.028654  | -0.426901 | 0.036024  |
| N | -9.097079 | 1.023026  | 0.143314  |
| N | -9.001023 | -0.237360 | -0.378659 |
| C | 0.178001  | 5.820969  | -2.381235 |
| H | 1.050402  | 6.140894  | -1.793588 |
| H | -0.705329 | 6.173233  | -1.829444 |
| C | 11.208775 | -5.089785 | -0.912974 |
| H | 11.467212 | -6.126698 | -1.109030 |
| C | 10.354896 | -4.769116 | 0.145232  |
| H | 9.953145  | -5.554587 | 0.779251  |
| C | 10.022680 | -3.439815 | 0.400514  |
| H | 9.371327  | -3.191858 | 1.233615  |
| C | 10.534841 | -2.412519 | -0.409028 |
| C | 10.261173 | -0.992990 | -0.114179 |
| C | 7.673905  | -0.778157 | -0.262608 |
| C | 6.841704  | 0.330232  | -0.064125 |
| C | 5.483070  | 0.155470  | -0.321859 |
| H | 4.810068  | 1.001628  | -0.205043 |
| C | 4.961524  | -1.071126 | -0.775067 |
| C | 3.511418  | -1.229905 | -1.047869 |
| C | 2.552559  | -0.593477 | -0.232570 |
| H | 2.885588  | -0.006196 | 0.619501  |
| C | 1.198871  | -0.739984 | -0.500276 |
| C | 0.006055  | -0.142076 | 0.247193  |
| C | -1.162096 | -0.701041 | -0.566625 |
| C | -2.523061 | -0.516882 | -0.368575 |
| H | -2.881473 | 0.075167  | 0.469663  |
| C | -3.456476 | -1.124422 | -1.234175 |
| C | -4.914512 | -0.937392 | -1.029713 |
| C | -5.432306 | 0.282121  | -0.553443 |
| H | -4.747958 | 1.104356  | -0.358474 |
| C | -6.796666 | 0.472839  | -0.340157 |
| B | -7.603591 | 1.750453  | 0.235481  |

|   |            |           |           |
|---|------------|-----------|-----------|
| C | -10.368402 | 1.195414  | 0.549337  |
| C | -10.901258 | 2.424336  | 1.166223  |
| C | -11.700786 | 2.311993  | 2.315489  |
| H | -11.863492 | 1.333057  | 2.757801  |
| C | -12.261546 | 3.444978  | 2.901873  |
| H | -12.869550 | 3.343298  | 3.796701  |
| C | -12.036422 | 4.705496  | 2.345332  |
| H | -12.472071 | 5.589569  | 2.802862  |
| C | -11.256287 | -4.695490 | -1.937490 |
| H | -11.541685 | -5.660773 | -2.346350 |
| C | -11.519455 | -4.395629 | -0.600073 |
| H | -12.007470 | -5.127391 | 0.037692  |
| C | -11.152198 | -3.156995 | -0.074530 |
| H | -11.348280 | -2.925426 | 0.968429  |
| C | -10.513130 | -2.203637 | -0.881488 |
| C | -10.208494 | -0.870673 | -0.327260 |
| C | -11.251775 | 4.824555  | 1.196896  |
| H | -11.080321 | 5.801165  | 0.752631  |
| C | -10.690004 | 3.693185  | 0.606586  |
| H | -10.100047 | 3.788263  | -0.297238 |
| C | -11.090370 | 0.020107  | 0.275126  |
| H | -12.149231 | -0.133548 | 0.420844  |
| C | -7.643398  | -0.598303 | -0.649391 |
| C | -7.189230  | -1.831586 | -1.113364 |
| H | -7.858559  | -2.659143 | -1.310519 |
| C | -5.816424  | -1.985016 | -1.296099 |
| H | -5.437190  | -2.948156 | -1.624177 |
| C | -2.971638  | -1.914207 | -2.295032 |
| H | -3.679642  | -2.360864 | -2.987207 |
| C | -1.606540  | -2.108990 | -2.497192 |
| H | -1.262791  | -2.719316 | -3.328778 |
| C | -0.696763  | -1.501770 | -1.629421 |
| C | 0.767626   | -1.526998 | -1.587562 |
| C | 1.703312   | -2.166081 | -2.403419 |
| H | 1.385683   | -2.768114 | -3.251261 |
| C | 3.061084   | -2.012110 | -2.129062 |
| H | 3.791794   | -2.481794 | -2.781316 |
| C | 0.032933   | 1.415732  | 0.226139  |
| H | -0.853892  | 1.775878  | 0.766944  |
| H | 0.900666   | 1.745999  | 0.814935  |
| C | 0.081973   | 2.077742  | -1.156714 |
| H | 0.969371   | 1.729124  | -1.700934 |
| H | -0.787183  | 1.760830  | -1.747793 |
| C | 0.107267   | 3.610559  | -1.077108 |
| H | 0.978349   | 3.932324  | -0.486689 |
| H | -0.778493  | 3.963275  | -0.527586 |
| C | 0.151187   | 4.288685  | -2.452327 |
| H | 1.035989   | 3.935978  | -3.002959 |
| H | -0.720386  | 3.968483  | -3.042624 |
| C | -0.045812  | -0.601066 | 1.733892  |

|   |           |           |           |
|---|-----------|-----------|-----------|
| H | 0.823322  | -0.170844 | 2.251742  |
| H | -0.930592 | -0.140625 | 2.196344  |
| C | -0.081026 | -2.114401 | 1.982678  |
| H | 0.814846  | -2.580832 | 1.552377  |
| H | -0.940465 | -2.552862 | 1.459021  |
| C | -0.167821 | -2.459860 | 3.475810  |
| H | 0.692928  | -2.021266 | 4.003485  |
| H | -1.061184 | -1.982205 | 3.901545  |
| C | -0.204467 | -3.971052 | 3.745129  |
| H | -1.076657 | -4.408815 | 3.236570  |
| H | 0.679386  | -4.432531 | 3.281963  |
| C | -0.241338 | -4.357344 | 5.233197  |
| H | -0.121563 | -5.446242 | 5.316208  |
| H | 0.628482  | -3.917101 | 5.741922  |
| C | -1.523740 | -3.943173 | 5.965162  |
| H | -1.652519 | -2.855155 | 5.981394  |
| H | -1.512876 | -4.288162 | 7.005627  |
| H | -2.409466 | -4.373739 | 5.481019  |
| C | 11.186334 | 0.014768  | 0.135816  |
| H | 12.259752 | -0.099423 | 0.162813  |
| C | 10.458492 | 1.174271  | 0.457299  |
| N | 9.145162  | 0.888358  | 0.392835  |
| B | 7.660872  | 1.639316  | 0.414216  |
| C | 7.678037  | 2.846491  | -0.673205 |
| H | 7.975279  | 2.526138  | -1.681064 |
| H | 8.344706  | 3.667497  | -0.376747 |
| H | 6.670897  | 3.277761  | -0.762287 |
| C | 11.022119 | 2.488010  | 0.819308  |
| C | 12.066132 | 3.013637  | 0.040495  |
| H | 12.398327 | 2.472222  | -0.840930 |
| C | 12.656204 | 4.230738  | 0.375567  |
| H | 13.456022 | 4.629750  | -0.242326 |
| C | 12.215934 | 4.937104  | 1.496543  |
| H | 12.674550 | 5.886953  | 1.757627  |
| C | 11.186222 | 4.416183  | 2.282168  |
| H | 10.844974 | 4.955567  | 3.161451  |
| C | 10.593966 | 3.198281  | 1.950666  |
| H | 9.809182  | 2.787463  | 2.574444  |
| C | 11.731478 | -4.073941 | -1.714661 |
| H | 12.395813 | -4.316509 | -2.539411 |
| C | 11.398807 | -2.742840 | -1.464059 |
| H | 11.797386 | -1.951653 | -2.092550 |
| C | 7.217777  | -2.012246 | -0.722604 |
| H | 7.880860  | -2.852461 | -0.883961 |
| C | 5.852774  | -2.142465 | -0.972032 |
| H | 5.470484  | -3.103803 | -1.302174 |
| C | -7.500651 | 3.041890  | -0.751238 |
| H | -7.934846 | 2.877222  | -1.747592 |
| H | -6.440164 | 3.282008  | -0.913132 |
| H | -7.956207 | 3.946891  | -0.329239 |

|   |            |           |           |
|---|------------|-----------|-----------|
| C | -7.288279  | 2.080558  | 1.795358  |
| H | -7.943854  | 2.864606  | 2.197739  |
| H | -6.258703  | 2.453019  | 1.892976  |
| H | -7.373783  | 1.206951  | 2.455918  |
| C | -10.261831 | -2.509137 | -2.229351 |
| H | -9.787307  | -1.769398 | -2.867622 |
| C | -10.627558 | -3.748989 | -2.750247 |
| H | -10.429179 | -3.972455 | -3.794802 |
| C | 7.244591   | 2.104212  | 1.919166  |
| H | 6.158960   | 2.274119  | 1.951321  |
| H | 7.709505   | 3.050162  | 2.225042  |
| H | 7.462483   | 1.354286  | 2.692892  |
| C | 0.218558   | 6.489423  | -3.759140 |
| H | 0.237704   | 7.582203  | -3.674660 |
| H | -0.659606  | 6.216923  | -4.357675 |
| H | 1.109049   | 6.183221  | -4.322058 |

### Compound 9

|   |            |           |           |
|---|------------|-----------|-----------|
| N | 8.929480   | -0.348859 | 0.018223  |
| N | -8.973521  | 0.893161  | -0.597056 |
| N | -8.912147  | -0.447714 | -0.335829 |
| C | 11.239711  | -4.749191 | 1.659179  |
| H | 11.526644  | -5.728963 | 2.030837  |
| C | 10.340012  | -3.962132 | 2.382181  |
| H | 9.930667   | -4.324278 | 3.321152  |
| C | 9.970915   | -2.704189 | 1.909060  |
| H | 9.282889   | -2.088042 | 2.480754  |
| C | 10.492138  | -2.220865 | 0.697539  |
| C | 10.178198  | -0.862454 | 0.214258  |
| C | 7.596870   | -0.857628 | -0.094916 |
| C | 6.734108   | 0.161099  | -0.516839 |
| C | 5.391742   | -0.175736 | -0.682840 |
| H | 4.696308   | 0.582349  | -1.035679 |
| C | 4.914919   | -1.479868 | -0.450349 |
| C | 3.478416   | -1.812239 | -0.624612 |
| C | 2.492920   | -0.880239 | -0.266870 |
| H | 2.781750   | 0.071393  | 0.167379  |
| C | 1.150314   | -1.218001 | -0.441221 |
| C | -1.107585  | -1.227679 | -0.484489 |
| C | -2.458745  | -0.901321 | -0.361667 |
| H | -2.772045  | 0.047629  | 0.061300  |
| C | -3.421475  | -1.842343 | -0.755588 |
| C | -4.867155  | -1.525457 | -0.637612 |
| C | -5.350819  | -0.227714 | -0.890013 |
| H | -4.649539  | 0.542743  | -1.202227 |
| C | -6.702000  | 0.093811  | -0.770388 |
| B | -7.471352  | 1.501102  | -0.974296 |
| C | -10.223063 | 1.303291  | -0.310934 |
| C | -10.718100 | 2.683776  | -0.463426 |



|   |            |           |           |
|---|------------|-----------|-----------|
| C | -11.479986 | 3.247783  | 0.573094  |
| H | -11.639754 | 2.681064  | 1.486212  |
| C | -12.007316 | 4.531570  | 0.447238  |
| H | -12.586466 | 4.958078  | 1.261731  |
| C | -11.785629 | 5.268298  | -0.717849 |
| H | -12.195158 | 6.269963  | -0.816264 |
| C | -11.272807 | -4.944961 | 0.927196  |
| H | -11.583953 | -5.964977 | 1.134941  |
| C | -11.468487 | -3.944865 | 1.880816  |
| H | -11.929435 | -4.183279 | 2.835320  |
| C | -11.068012 | -2.635546 | 1.614983  |
| H | -11.211260 | -1.857751 | 2.359557  |
| C | -10.462524 | -2.311931 | 0.391384  |
| C | -10.120851 | -0.906469 | 0.100402  |
| C | -11.038085 | 4.711076  | -1.756842 |
| H | -10.869818 | 5.274697  | -2.670399 |
| C | -10.509992 | 3.426457  | -1.635189 |
| H | -9.949255  | 2.989954  | -2.452919 |
| C | -10.966282 | 0.197188  | 0.137889  |
| H | -12.018285 | 0.184754  | 0.381051  |
| C | -7.571508  | -0.942643 | -0.409813 |
| C | -7.150640  | -2.243254 | -0.138056 |
| H | -7.835528  | -3.021114 | 0.174282  |
| C | -5.789638  | -2.517862 | -0.256643 |
| H | -5.433563  | -3.515960 | -0.020115 |
| C | -3.000111  | -3.095561 | -1.261619 |
| H | -3.750056  | -3.807388 | -1.592904 |
| C | -1.653998  | -3.419712 | -1.377509 |
| H | -1.358526  | -4.386743 | -1.776723 |
| C | -0.685618  | -2.488370 | -0.986212 |
| C | 0.758875   | -2.482073 | -0.958710 |
| C | 1.749674   | -3.404402 | -1.313697 |
| H | 1.478136   | -4.373601 | -1.724475 |
| C | 3.087616   | -3.068501 | -1.147269 |
| H | 3.855343   | -3.773254 | -1.451695 |
| C | -0.003558  | 0.871813  | 0.401158  |
| H | 0.876314   | 1.407633  | 0.026744  |
| H | -0.878332  | 1.397431  | 0.001465  |
| C | -0.025505  | 0.893269  | 1.937189  |
| H | 0.852109   | 0.351083  | 2.313495  |
| H | -0.906597  | 0.340005  | 2.288467  |
| C | -0.042909  | 2.319242  | 2.502566  |
| H | 0.838198   | 2.868397  | 2.137212  |
| H | -0.919691  | 2.851706  | 2.108784  |
| C | -0.055308  | 2.353866  | 4.037520  |
| H | -0.951879  | 1.831990  | 4.403789  |
| H | 0.804556   | 1.778363  | 4.408604  |
| C | -0.006195  | 3.765014  | 4.646340  |
| H | 0.119169   | 3.670922  | 5.733427  |
| H | 0.891718   | 4.284196  | 4.281563  |

|   |            |           |           |
|---|------------|-----------|-----------|
| C | -1.243943  | 4.624552  | 4.362268  |
| H | -1.369362  | 4.822528  | 3.291890  |
| H | -1.173336  | 5.594400  | 4.867947  |
| H | -2.157426  | 4.130643  | 4.716902  |
| C | 11.071083  | 0.168008  | -0.059701 |
| H | 12.144234  | 0.126631  | 0.052852  |
| C | 10.306668  | 1.299166  | -0.396682 |
| N | 9.003205   | 0.967883  | -0.343619 |
| B | 7.503938   | 1.563063  | -0.752572 |
| C | 7.547007   | 2.049549  | -2.302157 |
| H | 7.896483   | 1.273824  | -2.996962 |
| H | 8.183068   | 2.933516  | -2.445877 |
| H | 6.536655   | 2.334682  | -2.627954 |
| C | 10.827776  | 2.635655  | -0.737272 |
| C | 11.904642  | 2.734501  | -1.633539 |
| H | 12.293131  | 1.834100  | -2.101225 |
| C | 12.456723  | 3.975876  | -1.943525 |
| H | 13.283129  | 4.037290  | -2.646378 |
| C | 11.944612  | 5.135661  | -1.358665 |
| H | 12.373674  | 6.104118  | -1.600950 |
| C | 10.881027  | 5.045026  | -0.458977 |
| H | 10.483546  | 5.942300  | 0.007378  |
| C | 10.326870  | 3.804708  | -0.145447 |
| H | 9.515345   | 3.736587  | 0.569028  |
| C | 11.771140  | -4.271399 | 0.460363  |
| H | 12.470973  | -4.878592 | -0.107031 |
| C | 11.401721  | -3.014280 | -0.017658 |
| H | 11.807545  | -2.644614 | -0.954926 |
| C | 7.187099   | -2.170024 | 0.133249  |
| H | 7.874259   | -2.946457 | 0.444215  |
| C | 5.836799   | -2.464004 | -0.047391 |
| H | 5.488648   | -3.472419 | 0.154643  |
| C | -7.402376  | 2.020452  | -2.516932 |
| H | -7.888289  | 1.345759  | -3.235993 |
| H | -6.348736  | 2.088673  | -2.822954 |
| H | -7.824841  | 3.023809  | -2.656931 |
| C | -7.083853  | 2.633876  | 0.124937  |
| H | -7.718270  | 3.527057  | 0.046642  |
| H | -6.049948  | 2.969371  | -0.039445 |
| H | -7.140490  | 2.277880  | 1.162718  |
| C | -10.280104 | -3.321904 | -0.567639 |
| H | -9.832736  | -3.076502 | -1.526506 |
| C | -10.678871 | -4.629702 | -0.297368 |
| H | -10.533428 | -5.401644 | -1.047918 |
| C | 7.006533   | 2.711562  | 0.291157  |
| H | 5.917252   | 2.827529  | 0.197306  |
| H | 7.435508   | 3.700927  | 0.086565  |
| H | 7.200948   | 2.469932  | 1.345875  |
| N | 0.012464   | -0.466028 | -0.167474 |

## Compound 10

|   |            |           |           |
|---|------------|-----------|-----------|
| S | 0.000075   | 0.363555  | 0.000493  |
| N | -7.427406  | -0.739623 | 0.083495  |
| N | 6.786344   | 0.330208  | 0.478328  |
| N | -6.786198  | 0.330454  | -0.478156 |
| C | 6.507733   | -3.279976 | 0.290280  |
| H | 6.658573   | -3.119100 | 1.367228  |
| H | 7.319549   | -3.923624 | -0.072235 |
| H | 5.585743   | -3.870725 | 0.193415  |
| C | -11.862462 | -2.878501 | 1.758429  |
| H | -12.667162 | -3.493191 | 2.152521  |
| C | -10.944565 | -3.418792 | 0.856018  |
| H | -11.036196 | -4.454003 | 0.539075  |
| C | -9.910176  | -2.633982 | 0.348179  |
| H | -9.213224  | -3.050891 | -0.368724 |
| C | -9.776638  | -1.295340 | 0.745603  |
| C | -8.728591  | -0.415085 | 0.197736  |
| C | -5.035244  | -1.066303 | 0.111999  |
| C | -3.681783  | -1.373424 | 0.219804  |
| H | -3.386266  | -2.313124 | 0.679325  |
| C | -2.679681  | -0.481759 | -0.215440 |
| C | -1.264867  | -0.848837 | -0.102361 |
| C | 1.264966   | -0.848911 | 0.102883  |
| C | 2.679801   | -0.481916 | 0.215947  |
| C | 3.075006   | 0.756935  | 0.757055  |
| H | 2.321998   | 1.456538  | 1.108338  |
| C | 4.418635   | 1.102457  | 0.877956  |
| H | 4.694280   | 2.063556  | 1.292352  |
| C | 5.365763   | 0.171994  | 0.453924  |
| C | 7.671414   | 1.335021  | 0.741833  |
| C | 7.362963   | 2.604041  | 1.428254  |
| C | 6.770339   | 2.620020  | 2.701732  |
| H | 6.487655   | 1.683636  | 3.174108  |
| C | 6.554481   | 3.827968  | 3.362544  |
| H | 6.096150   | 3.826958  | 4.347561  |
| C | 6.935504   | 5.033044  | 2.767336  |
| H | 6.767305   | 5.973175  | 3.285258  |
| C | -6.936319  | 5.033092  | -2.767746 |
| H | -6.768374  | 5.973200  | -3.285792 |
| C | -6.553868  | 3.828129  | -3.362254 |
| H | -6.094683  | 3.827163  | -4.346873 |
| C | -6.769399  | 2.620209  | -2.701280 |
| H | -6.485644  | 1.683910  | -3.173180 |
| C | -7.363123  | 2.604145  | -1.428315 |
| C | -7.671355  | 1.335159  | -0.741788 |
| C | -5.365605  | 0.172254  | -0.453567 |
| C | -4.418408  | 1.102897  | -0.877039 |
| H | -4.693981  | 2.064189  | -1.291047 |

|   |            |           |           |
|---|------------|-----------|-----------|
| C | -3.074799  | 0.757320  | -0.756088 |
| H | -2.321725  | 1.457089  | -1.106912 |
| N | 7.427573   | -0.739788 | -0.083454 |
| C | 8.728729   | -0.415100 | -0.197833 |
| C | 8.912458   | 0.885668  | 0.304802  |
| H | 9.851974   | 1.406361  | 0.415005  |
| C | 7.536138   | 5.024863  | 1.507575  |
| H | 7.834725   | 5.958450  | 1.038933  |
| C | 7.750669   | 3.818181  | 0.841736  |
| H | 8.209536   | 3.810662  | -0.142787 |
| C | 9.776870   | -1.295103 | -0.745824 |
| C | 10.711451  | -0.755609 | -1.645019 |
| H | 10.611010  | 0.278749  | -1.961883 |
| C | 11.744923  | -1.542535 | -2.149384 |
| H | 12.454513  | -1.113873 | -2.851853 |
| C | 11.862846  | -2.877895 | -1.759040 |
| H | 12.667597  | -3.492428 | -2.153274 |
| C | 10.944047  | -3.418898 | -0.857969 |
| H | 11.035005  | -4.454528 | -0.542210 |
| C | 9.909598   | -2.634295 | -0.349948 |
| H | 9.211993   | -3.051802 | 0.365951  |
| B | 6.341315   | -1.904338 | -0.566852 |
| C | 5.035318   | -1.066359 | -0.112016 |
| C | 3.681833   | -1.373425 | -0.219758 |
| H | 3.386259   | -2.312940 | -0.679615 |
| C | 6.477981   | -2.102056 | -2.173655 |
| H | 5.689722   | -2.779645 | -2.531096 |
| H | 7.435385   | -2.558583 | -2.458975 |
| H | 6.374554   | -1.167727 | -2.742043 |
| C | 0.706943   | -2.108016 | 0.057387  |
| H | 1.299007   | -3.014187 | 0.124052  |
| C | -0.706888  | -2.107971 | -0.057167 |
| H | -1.299008  | -3.014092 | -0.124043 |
| C | -6.477943  | -2.102009 | 2.173503  |
| H | -5.689836  | -2.779812 | 2.530883  |
| H | -7.435453  | -2.558295 | 2.458857  |
| H | -6.374241  | -1.167720 | 2.741904  |
| C | -11.743723 | -1.543667 | 2.150328  |
| H | -12.452635 | -1.115598 | 2.853844  |
| C | -10.710318 | -0.756535 | 1.646141  |
| H | -10.609215 | 0.277427  | 1.964089  |
| C | -8.912422  | 0.885646  | -0.304901 |
| H | -9.852019  | 1.406167  | -0.415262 |
| C | -7.752261  | 3.818183  | -0.842504 |
| H | -8.211973  | 3.810609  | 0.141625  |
| C | -7.538055  | 5.024824  | -1.508505 |
| H | -7.837754  | 5.958324  | -1.040402 |
| B | -6.341379  | -1.904232 | 0.566661  |
| C | -6.508084  | -3.279787 | -0.290496 |
| H | -5.586388  | -3.870947 | -0.193284 |

|   |           |           |           |
|---|-----------|-----------|-----------|
| H | -6.658459 | -3.118866 | -1.367507 |
| H | -7.320347 | -3.923028 | 0.071722  |

**Compound 11**

|   |            |           |           |
|---|------------|-----------|-----------|
| S | -2.144334  | 0.511043  | 0.228356  |
| N | -8.757054  | -0.593211 | -0.173673 |
| N | -9.067362  | 0.739028  | -0.203345 |
| C | -9.875157  | -1.340665 | 0.059518  |
| C | -10.922555 | -0.438585 | 0.207627  |
| H | -11.963836 | -0.689937 | 0.343887  |
| C | -10.387977 | 0.850454  | 0.030402  |
| C | -11.137914 | 2.118670  | 0.076014  |
| C | -12.074939 | 2.313433  | 1.104269  |
| H | -12.186891 | 1.555298  | 1.874418  |
| C | -12.838354 | 3.477993  | 1.156028  |
| H | -13.551859 | 3.618495  | 1.963413  |
| C | -12.681190 | 4.462376  | 0.178363  |
| H | -13.275298 | 5.371266  | 0.218726  |
| C | -11.759010 | 4.272275  | -0.852246 |
| H | -11.637545 | 5.029699  | -1.621725 |
| C | -10.994130 | 3.107999  | -0.907987 |
| H | -10.295786 | 2.955501  | -1.721914 |
| C | -9.947195  | -2.814148 | 0.067953  |
| C | -10.550182 | -3.469071 | 1.152424  |
| H | -10.891653 | -2.886017 | 2.002865  |
| C | -10.696714 | -4.856073 | 1.147457  |
| H | -11.158844 | -5.351378 | 1.996833  |
| C | -10.246370 | -5.604554 | 0.058952  |
| H | -10.359596 | -6.685076 | 0.055886  |
| C | -9.652698  | -4.959733 | -1.028899 |
| H | -9.309798  | -5.535791 | -1.883841 |
| C | -9.507358  | -3.573607 | -1.028867 |
| H | -9.059772  | -3.073428 | -1.882903 |
| C | -7.344440  | -0.809986 | -0.197411 |
| C | -6.690643  | -2.038716 | -0.107930 |
| H | -7.225736  | -2.973870 | -0.004167 |
| C | -5.299178  | -2.032676 | -0.126827 |
| H | -4.768586  | -2.973846 | -0.022686 |
| C | -4.570364  | -0.831426 | -0.243781 |
| C | -5.284719  | 0.380987  | -0.319377 |
| H | -4.734849  | 1.314598  | -0.417522 |
| C | -6.676485  | 0.417663  | -0.284653 |
| C | -3.106501  | -0.867953 | -0.277973 |
| C | -2.278113  | -1.898057 | -0.669980 |
| H | -2.654474  | -2.842896 | -1.046582 |
| C | -0.897363  | -1.596451 | -0.576595 |
| H | -0.113923  | -2.293551 | -0.855365 |
| C | -0.636643  | -0.323753 | -0.109158 |

|   |           |           |           |
|---|-----------|-----------|-----------|
| C | -7.609744 | 2.651933  | 0.960924  |
| H | -7.662665 | 2.120644  | 1.920887  |
| H | -8.400504 | 3.414081  | 0.960656  |
| H | -6.653424 | 3.193696  | 0.950515  |
| C | -7.628527 | 2.448408  | -1.763194 |
| H | -6.589751 | 2.754186  | -1.952456 |
| H | -8.224388 | 3.369989  | -1.788442 |
| H | -7.927715 | 1.828977  | -2.620589 |
| B | -7.695719 | 1.672183  | -0.331862 |
| S | 2.144335  | -0.511090 | -0.228243 |
| N | 8.757054  | 0.593211  | 0.173669  |
| N | 9.067379  | -0.739024 | 0.203307  |
| C | 9.875138  | 1.340686  | -0.059541 |
| C | 10.922545 | 0.438624  | -0.207691 |
| H | 11.963818 | 0.689994  | -0.343977 |
| C | 10.387991 | -0.850427 | -0.030476 |
| C | 11.137949 | -2.118629 | -0.076137 |
| C | 12.074933 | -2.313360 | -1.104435 |
| H | 12.186835 | -1.555213 | -1.874580 |
| C | 12.838371 | -3.477903 | -1.156241 |
| H | 13.551843 | -3.618381 | -1.963660 |
| C | 12.681273 | -4.462300 | -0.178579 |
| H | 13.275399 | -5.371176 | -0.218979 |
| C | 11.759136 | -4.272229 | 0.852074  |
| H | 11.637725 | -5.029663 | 1.621552  |
| C | 10.994234 | -3.107970 | 0.907862  |
| H | 10.295928 | -2.955493 | 1.721825  |
| C | 9.947148  | 2.814170  | -0.067959 |
| C | 10.550091 | 3.469120  | -1.152439 |
| H | 10.891552 | 2.886084  | -2.002896 |
| C | 10.696593 | 4.856125  | -1.147458 |
| H | 11.158689 | 5.351451  | -1.996840 |
| C | 10.246261 | 5.604583  | -0.058932 |
| H | 10.359462 | 6.685107  | -0.055856 |
| C | 9.652631  | 4.959735  | 1.028926  |
| H | 9.309740  | 5.535775  | 1.883884  |
| C | 9.507321  | 3.573606  | 1.028881  |
| H | 9.059767  | 3.073406  | 1.882922  |
| C | 7.344439  | 0.809971  | 0.197451  |
| C | 6.690629  | 2.038697  | 0.108022  |
| H | 7.225712  | 2.973859  | 0.004274  |
| C | 5.299165  | 2.032645  | 0.126951  |
| H | 4.768562  | 2.973812  | 0.022849  |
| C | 4.570365  | 0.831383  | 0.243886  |
| C | 5.284733  | -0.381025 | 0.319431  |
| H | 4.734874  | -1.314644 | 0.417563  |
| C | 6.676498  | -0.417687 | 0.284674  |
| C | 3.106502  | 0.867898  | 0.278109  |
| C | 2.278114  | 1.897983  | 0.670164  |
| H | 2.654475  | 2.842814  | 1.046788  |

|   |          |           |           |
|---|----------|-----------|-----------|
| C | 0.897364 | 1.596370  | 0.576796  |
| H | 0.113925 | 2.293454  | 0.855605  |
| C | 0.636645 | 0.323685  | 0.109324  |
| C | 7.609752 | -2.651914 | -0.960983 |
| H | 7.662647 | -2.120598 | -1.920933 |
| H | 8.400520 | -3.414053 | -0.960752 |
| H | 6.653438 | -3.193687 | -0.950567 |
| C | 7.628585 | -2.448462 | 1.763141  |
| H | 6.589809 | -2.754230 | 1.952423  |
| H | 8.224431 | -3.370054 | 1.788344  |
| H | 7.927807 | -1.829061 | 2.620545  |
| B | 7.695747 | -1.672197 | 0.331828  |

### Compound Pz

|   |           |           |           |
|---|-----------|-----------|-----------|
| N | -0.265820 | 0.556302  | -0.010346 |
| N | 1.042183  | 0.917598  | -0.008005 |
| C | -3.115537 | 3.653012  | -0.270160 |
| C | -2.010655 | 3.774685  | 0.575655  |
| H | -1.875976 | 4.673225  | 1.171510  |
| C | -1.076052 | 2.745231  | 0.668150  |
| C | -1.245530 | 1.587909  | -0.099007 |
| C | -0.422545 | -0.814696 | -0.006761 |
| C | -1.702140 | -1.540578 | 0.083045  |
| C | -1.902188 | -2.682047 | -0.710884 |
| H | -1.133437 | -2.975054 | -1.420359 |
| C | -3.076950 | -3.425715 | -0.604972 |
| H | -3.215552 | -4.304202 | -1.229479 |
| C | -4.073053 | -3.039131 | 0.293099  |
| H | -4.989943 | -3.616510 | 0.374494  |
| C | -3.274051 | 2.497439  | -1.036889 |
| H | -4.122203 | 2.399418  | -1.708745 |
| C | -2.337909 | 1.466176  | -0.963384 |
| H | -2.447651 | 0.579209  | -1.576996 |
| C | 1.735781  | -0.224489 | -0.007296 |
| C | 0.858166  | -1.337622 | -0.014147 |
| H | 1.105982  | -2.387856 | 0.029364  |
| C | -2.708321 | -1.164755 | 0.989417  |
| H | -2.562462 | -0.296539 | 1.624329  |
| C | -3.883327 | -1.907081 | 1.089008  |
| H | -4.649879 | -1.604474 | 1.797324  |
| C | 3.208168  | -0.208506 | -0.001188 |
| C | 3.945142  | -1.402766 | -0.021512 |
| H | 3.427926  | -2.357854 | -0.043617 |
| C | 5.339171  | -1.380885 | -0.015493 |
| H | 5.891063  | -2.317172 | -0.031389 |
| C | 6.022973  | -0.164597 | 0.010057  |

|   |           |           |           |
|---|-----------|-----------|-----------|
| H | 7.109566  | -0.147249 | 0.014397  |
| C | 5.298732  | 1.030389  | 0.029323  |
| H | 5.821817  | 1.983119  | 0.048407  |
| C | 3.906728  | 1.010710  | 0.024148  |
| H | 3.341412  | 1.936658  | 0.037850  |
| H | -3.844287 | 4.456014  | -0.335834 |
| H | -0.210538 | 2.825869  | 1.315949  |

Compound **Pz-B**

|   |           |           |           |
|---|-----------|-----------|-----------|
| N | 0.763033  | 0.439613  | -0.085698 |
| N | -0.591977 | 0.261059  | -0.072305 |
| C | 4.984471  | -0.788494 | -1.050218 |
| H | 5.618130  | -0.364937 | -1.825108 |
| C | 3.620561  | -0.491386 | -1.037740 |
| H | 3.197139  | 0.148423  | -1.803964 |
| C | 2.786947  | -1.029107 | -0.044969 |
| C | 1.331859  | -0.778494 | -0.030843 |
| C | 0.312715  | -1.748280 | 0.019313  |
| H | 0.441446  | -2.821017 | 0.007792  |
| C | -0.900010 | -1.066449 | -0.021714 |
| C | -2.262037 | -1.638019 | -0.075375 |
| C | -2.709727 | -2.471081 | 0.961822  |
| H | -2.071935 | -2.637726 | 1.825799  |
| C | -3.969698 | -3.070715 | 0.893247  |
| H | -4.307277 | -3.708377 | 1.706038  |
| C | -4.793514 | -2.847893 | -0.212922 |
| H | -5.773793 | -3.314221 | -0.265839 |
| C | 3.343219  | -1.882306 | 0.923154  |
| H | 2.706127  | -2.297659 | 1.699721  |
| C | 4.707062  | -2.177963 | 0.908062  |
| H | 5.125158  | -2.831105 | 1.669709  |
| C | -3.092696 | -1.426025 | -1.188653 |
| H | -2.747318 | -0.795778 | -2.003907 |
| C | -4.350964 | -2.025513 | -1.254312 |
| H | -4.983425 | -1.854931 | -2.121564 |
| C | -1.292109 | 1.503935  | 0.062806  |
| C | -0.372112 | 2.559511  | 0.121275  |
| C | -0.901085 | 3.847443  | 0.255561  |
| H | -0.228636 | 4.701870  | 0.302912  |
| C | -2.282997 | 4.052672  | 0.342513  |
| H | -2.677541 | 5.060145  | 0.451890  |
| C | -3.162845 | 2.965081  | 0.297921  |
| H | -4.235040 | 3.125494  | 0.374493  |
| C | -2.675016 | 1.662400  | 0.156421  |
| H | -3.357768 | 0.822258  | 0.127908  |
| B | 1.159471  | 2.048627  | 0.040201  |
| C | 1.927747  | 2.587830  | -1.291749 |
| H | 1.473392  | 2.250276  | -2.235415 |



|   |          |           |           |
|---|----------|-----------|-----------|
| H | 2.992372 | 2.319203  | -1.313059 |
| H | 1.888052 | 3.687129  | -1.304824 |
| C | 2.001080 | 2.262263  | 1.416387  |
| H | 2.988555 | 1.780288  | 1.380795  |
| H | 1.482201 | 1.888885  | 2.311288  |
| H | 2.180722 | 3.335397  | 1.578019  |
| C | 5.532443 | -1.629852 | -0.077968 |
| H | 6.594934 | -1.858793 | -0.089765 |
